1           **Complexity of enhancer networks predicts cell identity and disease**  
2                           **genes revealed by single-cell multi-omics analysis**

3

4           Danni Hong,<sup>1,5</sup> Hongli Lin,<sup>1,5</sup> Lifang Liu,<sup>1</sup> Muya Shu,<sup>3</sup> Jianwu Dai,<sup>3,4</sup> Falong Lu,<sup>3,4</sup>  
5                           Mengsha Tong,<sup>1,2</sup>Jialiang Huang,<sup>1,2,\*</sup>

6

7           <sup>1</sup> State Key Laboratory of Cellular Stress Biology, Innovation Center for Cell Signaling  
8           Network, School of Life Sciences, Xiamen University, Xiamen, Fujian 361102, China.

9           <sup>2</sup> National Institute for Data Science in Health and Medicine, Xiamen University,  
10           Xiamen, Fujian 361102, China.

11           <sup>3</sup> State Key Laboratory of Molecular Developmental Biology, Institute of Genetics and  
12           Developmental Biology, Chinese Academy of Sciences, Beijing 100101, China.

13           <sup>4</sup> University of Chinese Academy of Sciences, Beijing 100049, China.

14           <sup>5</sup> These authors contributed equally.

15           \* To whom correspondence should be addressed.

16           E-mail: Jialiang Huang (jhuang@xmu.edu.cn)

17

18

19

20 **Abstract**

21 Many enhancers exist as clusters in the genome and control cell identity and  
22 disease genes; however, the underlying mechanism remains largely unknown. Here,  
23 we introduce an algorithm, eNet, to build enhancer networks by integrating single-cell  
24 chromatin accessibility and gene expression profiles. Enhancer network is a gene  
25 regulation model we proposed that not only delineates the mapping between  
26 enhancers and target genes, but also quantifies the underlying regulatory relationships  
27 among enhancers. The complexity of enhancer networks is assessed by two metrics:  
28 the number of enhancers and the frequency of predicted enhancer interactions (PEIs)  
29 based on chromatin co-accessibility. We apply eNet algorithm to a human blood  
30 dataset and find cell identity and disease genes tend to be regulated by complex  
31 enhancer networks. The network hub enhancers (enhancers with frequent PEIs) are  
32 the most functionally important in enhancer networks. Compared with super-  
33 enhancers, enhancer networks show better performance in predicting cell identity and  
34 disease genes. The establishment of enhancer networks drives gene expression  
35 during lineage commitment. Applying eNet in various datasets in human or mouse  
36 tissues across different single-cell platforms, we demonstrate eNet is robust and widely  
37 applicable. Thus, we propose a model of enhancer networks containing three modes:  
38 Simple, Multiple and Complex, which are distinguished by their complexity in regulating  
39 gene expression.

40 Taken together, our work provides an unsupervised approach to simultaneously  
41 identify key cell identity and disease genes and explore the underlying regulatory  
42 relationships among enhancers in single cells, without requiring the cell type identity  
43 in advance.

44  
45

46 **Keywords**

47 Enhancer, enhancer network, network hub enhancers, super-enhancers, gene  
48 regulation, single-cell multi-omics

49

50 **Highlights**

- 51 • eNet, a computational method to build enhancer network based on scATAC-  
52 seq and scRNA-seq data
- 53 • Cell identity and disease genes tend to be regulated by complex enhancer  
54 networks, where network hub enhancers are functionally important
- 55 • Enhancer network outperforms the existing models in predicting cell identity  
56 and disease genes, such as super-enhancer and enhancer cluster
- 57 • We propose a model of enhancer networks in gene regulation containing three  
58 modes: Simple, Multiple and Complex

59

60

61

62

## 63 **Introduction**

64 Enhancers play a central role in orchestrating spatiotemporal gene expression  
65 programs during development and diseases (Consortium, 2012; Long et al., 2016;  
66 Maurano et al., 2012). Many enhancers exist as clusters in the genome to control gene  
67 expression, termed enhancer clusters, which control the expression of the same target  
68 gene (Blobel et al., 2021). Enhancer clusters are remarkably widespread features in  
69 the genome and provide an effective regulatory buffer for phenotypic robustness during  
70 development (Osterwalder et al., 2018; Perry et al., 2011). Several enhancer clusters  
71 in the genome have been described as super-enhancers (SEs), which exhibit  
72 disproportionately high signals for enhancer marks and control the expression of genes  
73 that define cell identity and diseases (Hnisz et al., 2013).

74 Genome editing using the CRISPR/Cas9 system offers an opportunity for  
75 dissecting the functions of enhancer clusters (Jinek et al., 2012). Several groups,  
76 including ours, have utilized genome editing assays to functionally dissect individual  
77 constituent elements of a couple of SEs (Bahr et al., 2018; Cai et al., 2020; Canver et  
78 al., 2015; Fulco et al., 2016; Hay et al., 2016; Huang et al., 2016; Kai et al., 2021; Shin  
79 et al., 2016; Thomas et al., 2021). These studies suggest the diversity of enhancer  
80 cluster regulatory mechanisms, where the individual components may act additively,  
81 redundantly, synergistically, or temporally. Meanwhile, genome-wide chromatin  
82 conformation information has been used to investigate the relationship among the  
83 individual components of enhancer clusters and their effects on target gene expression  
84 (Dixon et al., 2012; Lieberman-Aiden et al., 2009; Liu et al., 2017; Rao et al., 2014;  
85 Schoenfelder and Fraser, 2019; Song et al., 2020). We and other groups uncover hub  
86 enhancers, the enhancers with frequent chromatin interactions, play distinct roles in  
87 chromatin organization and gene activation (Huang et al., 2018; Huang et al., 2015;  
88 Liu et al., 2020; Schmitt et al., 2016).

89 Single-cell sequencing techniques have been developed to measure molecular  
90 heterogeneity among individual cells, such as single cell RNA sequencing (scRNA-seq)  
91 for gene expression and single-cell Assay for Transposase-Accessible Chromatin



92 using sequencing (scATAC-seq) for chromatin accessibility (Buenrostro et al., 2015;  
93 Tang et al., 2009). It can even be used to achieve simultaneous detection of chromatin  
94 accessibility and gene expression in the same cells (Cao et al., 2018; Chen et al., 2019;  
95 Ma et al., 2020; Zhu et al., 2019). A large amount of single cell multi-omics profiles of  
96 chromatin accessibility and gene expression have been generated in various biological  
97 systems (Argelaguet et al., 2019; Granja et al., 2019; Li et al., 2021; Sarropoulos et al.,  
98 2021; Trevino et al., 2021; Ziffra et al., 2021), thereby providing ample opportunities to  
99 further understand the functions and mechanisms of enhancer clusters in single cells.  
100 For example, the co-accessible pairs of DNA elements predicted by Cicero from  
101 scATAC-seq data correspond with the chromatin contacts captured via ChIA-PET or  
102 promoter capture Hi-C (Pliner et al., 2018). However, these existing studies have  
103 largely focused on connecting enhancers with their target genes, but rarely on the  
104 regulatory relationship between enhancers. There remains a lack of method  
105 development to quantitatively assess how individual elements work together to  
106 regulate gene expression.

107 In this study, we proposed the concept of enhancer network complexity, which not  
108 only connects enhancers to putative target genes, but also quantifies how multiple  
109 enhancers interact with each other to regulate precise gene expression. Briefly, we  
110 developed a computational method termed eNet to build enhancer networks based on  
111 single-cell chromatin accessibility and gene expression data. Applying eNet on various  
112 biological systems, we found that the complexity of enhancer networks can predict cell  
113 identity and disease genes. Overall, we proposed a model of enhancer networks,  
114 which is not only useful in predicting cell identity and disease genes, but also provides  
115 a framework to study the general principles of regulatory relationships among  
116 enhancers in gene regulation.

## 117 **Results**

### 118 **eNet builds enhancer networks based on single cell multi-omics data**

119 Many enhancers exist as clusters in the genome; however, the underlying mechanism  
120 through which the clustered enhancers work together to regulate the same target gene  
121 remains largely unknown. To this end, we developed an algorithm eNet to build an  
122 enhancer network for each gene to quantitatively assess how multiple enhancers work  
123 together to regulate gene expression based on scATAC-seq and scRNA-seq data  
124 (**Methods**). The enhancer network we proposed is a gene regulation model that not  
125 only delineates the mapping between enhancers and target genes, but also quantifies  
126 the underlying regulatory relationships among enhancers, which differs from previous  
127 studies (Blobel et al., 2021; Hnisz et al., 2013; Ma et al., 2020; Osterwalder et al.,  
128 2018). First, given the scATAC-seq and scRNA-seq profiles, the enhancer accessibility  
129 and gene expression matrix of single cells were prepared as the input of eNet (**Figure**  
130 **1A**). Second, a set of enhancers were identified, termed a putative enhancer cluster  
131 hereafter, which putatively regulate a specific target gene within a  $\pm 100$  kb window  
132 based on the correlation between gene expression and enhancer accessibility in  
133 single-cell data (**Figure 1B**). Third, we evaluated the enhancer interaction potential  
134 based on their chromatin co-accessibility calculated by Cicero (Pliner et al., 2018), and  
135 determined the enhancer pairs with significantly high co-accessibility as the predicted  
136 enhancer interactions (PEIs) (**Figure 1C**). Fourth, an enhancer network was built to  
137 delineate how multiple enhancers interact with each other to regulate gene expression,  
138 where nodes represent enhancers and edges represent the PEIs between enhancers  
139 in a putative enhancer cluster (**Figure 1D**). Fifth, the complexity of the enhancer  
140 network was evaluated by two metrics: 1) the number of enhancers, termed the  
141 network size (*x*-axis), and 2) the frequency of PEIs, termed the network connectivity  
142 (*y*-axis), quantified by the average degree of network (Barabasi, 2016) (**Figure 1E**).  
143 Lastly, based on the network size and network connectivity, we classified the enhancer  
144 networks into several modes: Simple, Multiple, Complex and others (but will not be  
145 discussed due to limited cases) (**Figure 1F**). Intuitively, the complexity of the enhancer

146 network increased from Simple mode to Multiple mode by involving more enhancers  
147 and further to Complex mode by increasing the interactions between enhancers.  
148 Altogether, eNet builds enhancer networks to clarify how a putative enhancer cluster  
149 regulates gene expression based on scATAC-seq and scRNA-seq data.

150

### 151 **Cell identity and disease genes tend to be regulated by complex enhancer** 152 **networks during human hematopoiesis**

153 We first applied eNet to build enhancer networks during human hematopoiesis using  
154 a human blood dataset (Granja et al., 2019), including the single cell chromatin  
155 accessibility and transcriptional landscapes in human bone marrow and peripheral  
156 blood mononuclear cells (**Figure 2A**). In total, we built 11,438 enhancer networks  
157 during human hematopoiesis (**Figure 2B**). The number of enhancers in enhancer  
158 networks ranged from 1 to 50, with a median of 4 (**Figure S1A**). We noticed several  
159 blood-related cell identity or disease genes, such as *BCL11B*, *ETS1*, *CCR7* and *IL7R*  
160 displayed obviously large network size and high network connectivity (**Figure 2B**). This  
161 inspired the question that whether cell identity genes tend to be regulated by complex  
162 enhancer networks. To test this hypothesis, we classified these enhancer networks into  
163 three modes: Simple (controlled by one or few enhancers), Multiple (multiple  
164 enhancers but limited PEIs), and Complex (multiple enhancers and frequent PEIs). It  
165 resulted in 6,894 Simple, 2,992 Multiple and 1,552 Complex enhancer networks  
166 (**Figure 2B, Table S2 and Methods**). For example, the *CD3E* gene, encoding a  
167 subunit of the T-cell receptor-CD3 complex, was controlled by an enhancer network  
168 consisting of 14 PEIs among 9 enhancers (**Figure 2C**). In contrast, the *SERPINE2*  
169 gene, encoding a member of the serpin family of proteins that inhibit serine proteases,  
170 was controlled by an enhancer network containing the same number of enhancers but  
171 only 2 PEIs. Interestingly, the *CD3E* enhancer network showed significant higher  
172 chromatin co-accessibility than *SERPINE2*, irrespective of their indistinguishable  
173 chromatin accessibility and similar enhancer number (**Figure S1B and S1C**).

174 Next, we curated a list of known cell identity genes in the blood system (**Methods,**

175 **Table S3**) and calculated their enrichment in the genes regulated by three enhancer  
176 network modes (**Figure 2E**). We observed that genes regulated by Multiple mode  
177 showed higher enrichment in cell identity genes than those by Simple mode, which is  
178 consistent with previous reports that developmentally expressed genes are commonly  
179 associated with multiple enhancers (Ma et al., 2020; Osterwalder et al., 2018; Tsai et  
180 al., 2019). In addition, we found that genes regulated by Complex mode exhibited the  
181 highest enrichment in cell identity genes, 8.7-fold using the whole genome as the  
182 background (**Figure 2E**). Similarly, genes regulated by Complex mode displayed a  
183 higher enrichment in blood-related disease genes curated from DisGeNET (Pinero et  
184 al., 2017) than those by Multiple mode (4.8-fold vs. 2.4-fold,  $p = 3.4E-20$ , binomial test,  
185 **Figure 2F**). Notably, these observations were robust to various threshold values of  
186 network size and network connectivity (**Figure S2**). We also clarified that Complex  
187 mode enhancer network not mainly represents the enhancer networks with a stronger  
188 chromatin accessibility or larger enhancer number (network size) (**Figure S3 and S4**).  
189 These results suggested that cell identity and disease genes tend to be regulated by  
190 complex enhancer networks.

191

### 192 **Complexity of enhancer networks predicts cell identity and disease genes**

193 To systematically evaluate the performance of the complexity of enhancer networks in  
194 predicting cell identity and disease genes, we ranked enhancer networks by the  
195 properties of enhancer networks, including network size, network connectivity, and  
196 overall chromatin accessibility. We then calculated the enrichment of cell identity and  
197 disease genes in the list of top ranked enhancer networks related genes, using the  
198 whole genome as the background (**Figure 2G and 2H**). We found that the genes  
199 controlled by enhancer networks with more enhancers were overall preferentially more  
200 enriched for cell identity genes (**Figure 2G**), which concurs with previous studies  
201 (Hnisz et al., 2013; Ma et al., 2020; Osterwalder et al., 2018). Meanwhile, we observed  
202 an obvious correlation between network connectivity and the enrichment of cell identity  
203 genes. Importantly, network connectivity displayed better performance in predicting

204 cell identity genes than the network size. For example, the top 50 genes ranked by  
205 network connectivity were 77.7-fold enriched of cell identity genes, compared with  
206 those by network size (29.9-fold), using the whole genome as the background. Both  
207 the network connectivity and network size showed remarkably better performance in  
208 predicting cell identity genes than the chromatin accessibility of enhancers in the  
209 network. Similarly, network connectivity displayed the best performance in predicting  
210 blood-related disease genes (6.8-fold in the top 50 genes, **Figure 2H**). Therefore,  
211 these analyses suggest complexity of enhancer networks can predict cell identity and  
212 disease genes.

213

#### 214 **Network hub enhancers are functionally important**

215 Enhancer networks provide an opportunity to study how individual elements work and  
216 then how they interact with each other to control gene expression. Toward this end, we  
217 focused on the enhancers with frequent PEIs in enhancer networks in Complex mode,  
218 termed network hub enhancers (**Methods**). To gain insight into the function of network  
219 hub enhancers in enhancer networks, we first compared the phastCons conservation  
220 scores (Siepel et al., 2005) of enhancers in Complex (hub and non-hub) and found  
221 that network hub enhancers displayed significantly higher level of sequence  
222 conservation than non-hub enhancers ( $p = 3.8E-8$ , Student's *t*-test, **Figure S1D**),  
223 suggesting network hub enhancers might be more functionally important. Next, we  
224 assessed the enrichment of single-nucleotide polymorphisms (SNPs) linked to diverse  
225 phenotypic traits and diseases in the genome-wide association study (GWAS) catalog  
226 (Welter et al., 2014), in enhancers in Complex (hub and non-hub), Multiple, and Simple  
227 modes. We observed significantly higher enrichment of blood-associated GWAS SNPs  
228 in enhancers in Multiple mode than those in Simple mode ( $p = 2.8E-4$ , binomial test,  
229 **Figure 2I and 2J**), which is consistent with previous studies (Hnisz et al., 2013;  
230 Osterwalder et al., 2018). Additionally, the enhancers in Complex mode (hub and non-  
231 hub) showed higher enrichment in GWAS SNPs associated with blood traits than those  
232 in Multiple mode. In particular, in Complex mode, hub enhancers displayed higher

233 enrichment of GWAS SNPs associated with blood traits than non-hub enhancers (6.7-  
234 fold vs. 5.3-fold,  $p = 5.8E-3$ , binomial test, **Figure 2J**), suggesting hub enhancers might  
235 play important roles in enhancer networks. These results suggest that compared with  
236 Multiple and Simple modes, enhancers in Complex mode might be more important in  
237 diseases, where hub enhancers are major functional constituents.

238

### 239 **Enhancer network outperforms super-enhancer in predicting cell identity and** 240 **disease genes**

241 Super-enhancers (SEs) are clustered enhancers with a high density of transcriptional  
242 apparatus to drive robust expression of cell identity and disease genes (Hnisz et al.,  
243 2013). We next compared the performance of predicting cell identity and disease  
244 genes by enhancer networks and SEs. To this end, we downloaded a list of SEs  
245 associated with hematopoiesis-related cell types from the dbSUPER database (Khan  
246 and Zhang, 2016) and curated a catalog of hematopoiesis-related SEs containing  
247 2,306 SEs (**Table S4**). We identified 2,159 potential target genes regulated by these  
248 SEs using ROSE algorithm (Hnisz et al., 2013). Comparing the genes regulated by  
249 SEs or by enhancer networks in Complex mode, we separated them into three groups:  
250 Complex-only (836), SE-only (1,443) and Complex SE (716) (**Figure 3A**). The  
251 constituent enhancers in these two groups (SE-only vs. Complex SE) showed  
252 significantly different chromatin co-accessibility, but indistinguishable chromatin  
253 accessibility (**Figure 3B** and **3C**). It might explain the diverse and heterogeneous  
254 mechanisms of SEs, such as cooperative, redundant and hierarchical revealed by  
255 CRISPR/Cas9 genome editing assays. Strikingly, genes in Complex-only group  
256 displayed significantly higher enrichment in cell identity and disease genes than those  
257 in SE-only group, while genes in Complex SE group showed the highest enrichment  
258 (**Figure 3D** and **3E**). Moreover, we observed similar patterns in GM12878 cell line that  
259 enhancer networks precede SEs in predicting cell identity and disease genes (**Figure**  
260 **S5A-S5C**). We further ranked genes by network connectivity, network size, chromatin  
261 accessibility or SE ranks based on H3K27ac signal, and found that network

262 connectivity showed the best performance in predicting both cell identity and disease  
263 genes, comparing with network size, chromatin accessibility and SE ranks (**Figure 3F**  
264 and **3G**). These results suggested that the enhancer networks precede SEs in  
265 predicting cell identity and disease genes.

266

### 267 **Enhancer networks based on PEIs remedy the resolution limitations in Hi-C** 268 **chromatin interactions**

269 The proximity ligation-based methods to capture genome-wide chromatin interactions  
270 at high-resolution for the analysis of enhancer interactions remains difficult and costly  
271 (Lieberman-Aiden et al., 2009; Mumbach et al., 2017; Tang et al., 2015). We wonder  
272 to what extent the PEIs in eNet analysis resolve the resolution limitations in Hi-C data.  
273 To this end, we compared enhancer networks based on PEIs and Hi-C data in  
274 GM12878 cell line (human B-lymphoblastoid cells), where scATAC-seq (Ma et al.,  
275 2020), H3K27ac ChIP-seq (Consortium, 2012) and high-resolution Hi-C data (Rao et  
276 al., 2014) are available. We observed the high co-accessible enhancer pairs (PEIs)  
277 showed significant enrichment of Hi-C chromatin interactions (**Figure 4A**), indicating  
278 the overall concordance between co-accessible pairs and proximity ligation-based  
279 chromatin interactions (Pliner et al., 2018). For example, at the locus controlling *CCR7*,  
280 a gene expressed in various lymphoid tissues and activates B and T lymphocytes, we  
281 predicted 20 PEIs based on scATAC-seq data, while only 10 chromatin interactions  
282 were detected via Hi-C probably due to the limited resolution at 5kb level (**Figure 4B-**  
283 **C**). We systematically compared the enhancer networks based on scATAC-seq and  
284 Hi-C data by replacing PEIs with Hi-C interactions and re-built enhancer networks. We  
285 observed a significant overlap between the genes controlled by the complex enhancer  
286 networks based on PEIs and Hi-C data (**Figure 4D**,  $p < 2.2E-16$ , Fisher's exact test).  
287 Interestingly, PEI-only group showed significant higher enrichment of cell identity and  
288 disease genes than HiC-only group, where PEI-with-HiC showed the highest  
289 enrichment (**Figure 4E** and **4F**). Moreover, we found the network hub enhancers  
290 derived from PEIs showed significant higher enrichment of GWAS SNPs than those



291 from Hi-C data (**Figure S5D-S5F**). Taken together, these results suggested enhancer  
292 networks based on PEIs remedy the resolution limitations of chromatin interactions in  
293 Hi-C data.

294

### 295 **Dynamics of PAX5 enhancer network drives gene expression during B cell** 296 **lineage commitment**

297 Enhancer networks were built based on single cell multi-omics data, providing an  
298 opportunity to investigate the dynamic role of enhancer networks in determining gene  
299 expression during cell differentiation. To this end, we focused on B cell differentiation,  
300 from hematopoietic stem cell (HSC), lymphoid-primed multipotent progenitor (LMPP),  
301 common lymphoid progenitor (CLP), pre-B, to B cells (**Figure 5A** and **Methods**). The  
302 *PAX5* gene, a known key regulator for B cell differentiation, specifically expressed in  
303 pre-B and B cells, was controlled by a putative enhancer cluster consisting of 24  
304 enhancers (**Figure 5B** and **5C**). To understand the relationship between these  
305 constituent enhancers and their roles in regulating gene expression during cell  
306 differentiation, we built cell-type-specific enhancer networks by constructing the  
307 enhancer networks for each cell type independently (**Methods**). Comparing the  
308 enhancer networks specific for HSC, LMPP, CLP, pre-B, and B cells, we observed the  
309 sequential changes in the constituent enhancers during B cell differentiation, in terms  
310 of both chromatin accessibility and network interactions (**Figure 5D**). Within the *PAX5*  
311 enhancer network, we noticed that enhancer E14, constitutively accessible from HSC  
312 to B cells, functions as a network hub enhancer to coordinate enhancer network  
313 interactions to establish the enhancer network gradually during B cell differentiation  
314 (**Figure 5D**). Interestingly, we found that the *PAX5* enhancer network was almost fully  
315 established in the CLP and pre-B stages, which preceded the gene expression of *PAX5*  
316 in pre-B and B cells (**Figure 5C** and **5D**). It suggests the establishment of an enhancer  
317 network may drive gene expression during lineage commitment.

318 To test this hypothesis, we performed trajectory analysis for B cell differentiation  
319 using the method described before (Satpathy et al., 2019) to order cells in pseudotime



320 based on scATAC-seq data in HSC, LMPP, CLP, pre-B, and B cells (**Figure S5G**). We  
321 then systematically compared gene expression, chromatin accessibility, and enhancer  
322 network connectivity along the B cell differentiation pseudotime (**Figure S5H**). We  
323 quantified the differences in pseudotime of B cell differentiation between the onset of  
324 gene expression and establishment of the enhancer network (**Methods**). Notably,  
325 there was a lag of pseudotime between the onset of gene expression and chromatin  
326 accessibility ( $p = 2.8E-2$ , Student's  $t$ -test, **Figure S5H** and **S5I**), which supports the  
327 hypothesis that chromatin accessibility is a marker for lineage-priming (Lara-Astiaso  
328 et al., 2014; Ma et al., 2020; Rada-Iglesias et al., 2011). More importantly, we found  
329 enhancer networks were established earlier than gene expression occurred ( $p = 2.9E-$   
330  $6$ , Student's  $t$ -test, **Figure S5H** and **S5I**), even prior to the change in chromatin  
331 accessibility, suggesting the dynamics of enhancer networks drive gene expression  
332 during cell differentiation. Taken together, we demonstrate that enhancer networks are  
333 established gradually during lineage commitment, which drives the expression of cell  
334 identity genes.

335

### 336 **eNet is robust and broadly applicable**

337 To investigate the broad applicability of eNet, we applied it to various datasets in  
338 human or mouse tissues across different single-cell platforms, including SHARE-seq  
339 mouse skin dataset (Ma et al., 2020), SNARE-seq mouse cerebral cortex dataset  
340 (Chen et al., 2019) and sci-ATAC-seq3 human fetal kidney and heart datasets  
341 (Domcke et al., 2020). Similar to the above findings, we found cell identity and disease  
342 genes tended to be regulated by complex enhancer networks (**Figure S6A, S6C, S6E,**  
343 **and S6G**). The network connectivity showed the best performance in predicting cell  
344 identity genes and disease genes (**Figure 6A, 6C, 6E, 6G, S6B, S6D, S6F** and **S6H**).  
345 Hub enhancers in Complex mode displayed the highest enrichment of tissue-related  
346 GWAS SNPs (**Figure 6B, 6D, 6F** and **6H**). These analyses in various human or mouse  
347 tissues datasets (**Figure 2, 6** and **S6**) support the conclusion that eNet is robust and  
348 broadly applicable in various biological systems and different single-cell platforms.

349

## 350 **Model of enhancer networks in gene regulation**

351 Our analysis revealed three modes of enhancer networks in regulating gene  
352 expression according to their network complexity: Complex, Multiple, and Simple. To  
353 further understand the underlying biological functions and mechanisms, we evaluated  
354 the functional enrichment of genes regulated by these three modes (**Figure 7A**). We  
355 found genes regulated by the Simple mode were primarily enriched in housekeeping  
356 functions, such as RNA modification and DNA repair (**Figure 7A**). In contrast, genes  
357 regulated by the Complex mode were enriched in key genes related to cell fate  
358 commitment, such as the regulation of leukocyte differentiation in human blood, skin  
359 development in mouse skin and cerebellar cortex formation in mouse cerebral datasets.  
360 Meanwhile, genes in Multiple mode were enriched in a mixture of both housekeeping  
361 and cell identity functions. In addition, Complex mode preferentially regulated  
362 upstream regulators, such as transcription factors (Lambert et al., 2018), which was  
363 observed in all three datasets (**Figure S7A**).

364 Therefore, we proposed a model of enhancer networks containing three modes  
365 according to their network complexity: Simple, Multiple, and Complex (**Figure 7B**). By  
366 definition, in Simple mode, gene regulation was controlled simply by one or a limited  
367 number of enhancers; we speculated it provided a quick response to control a large  
368 amount of regular genes, such as housekeeping genes, at a low cost. Meanwhile, in  
369 Multiple mode, gene regulation was controlled by multiple enhancers but limited PEIs;  
370 this might increase the strength of regulation and redundancy of gene expression at  
371 the cost of involving more enhancers. Lastly, gene regulation was controlled by multiple  
372 enhancers and frequent PEIs in Complex mode, perhaps the most robust to random  
373 failures of individual enhancers (transcriptional noise or genetic mutation), at the cost  
374 of connecting enhancers and primarily controls key cell identity genes. Enhancer  
375 networks are established gradually during lineage commitment and drive the  
376 expression of cell identity genes, where network hub enhancers play central roles to  
377 coordinate the network system.



## 379 **Discussion**

### 380 ***The concept of complexity of enhancer networks***

381 The term ‘enhancer’ first appeared to describe the effects of SV40 DNA sequences on  
382 the expression of a  $\beta$ -globin gene (Banerji et al., 1981). Since then, hundreds of  
383 thousands of enhancers have been nominated via genome-wide biochemical  
384 annotations (Gasparini et al., 2020; Neph et al., 2012). However, only a small number  
385 of enhancers have been functionally tested. While multiple enhancers existing as  
386 clusters in the genome to regulate the same target gene is prevalent, which are known  
387 to provide phenotypic robustness in development (Osterwalder et al., 2018; Perry et  
388 al., 2011), the underlying mechanisms remain largely unknown.

389 Enhancer networks have been reported in previous studies. For example, Malin  
390 et al. constructed enhancer network based on the correlated DNase hypersensitivity  
391 of enhancers across 72 cell types (Malin et al., 2013). Chen et al. built tissue-specific  
392 enhancer functional networks for associating distal regulatory regions to disease by  
393 integrating thousands of epigenetics and functional genomics data sets (Chen et al.,  
394 2021). Carleton et al. discovered the enhancer combinations by targeting a set of 10  
395 enhancers by simultaneous deactivation of multiple enhancers using CRISPR-based  
396 technique (Carleton et al., 2017). However, it is infeasible to scale up this approach to  
397 rigorously test a wide range of enhancers due to technical difficulties. Proximity  
398 ligation-based methods, including ChIA-PET and Hi-C (Lieberman-Aiden et al., 2009;  
399 Mumbach et al., 2017; Tang et al., 2015), capture chromatin interactions, but limited  
400 to the resolution. Most of ChIA-PET or Hi-C data can only achieve a resolution at 5-  
401 20kb, which is not sophisticated enough for enhancer studies at ~500bp (the median of  
402 enhancer length). In this study, we reported an algorithm eNet to build enhancer  
403 network per gene based on the rich source of single-cell multi-omics data and greatly  
404 extended these previous findings in understanding the biological relevance and  
405 implications of enhancer network. Most importantly, to our knowledge, we for the first  
406 time propose the concept of “complexity of enhancer network” and establish its  
407 functional links with cell identity or disease. Furthermore, our study overcomes the

408 above limitations on resolution and scalability by integrating single-cell multiple omics  
409 data to quantify enhancer interactions.

410 Chromatin co-accessibility based on scATAC-seq data has been used before, but  
411 mainly for connecting enhancers to their putative target genes (Pliner et al., 2018). We  
412 quantified the complexity of the enhancer network by two metrics: network size and  
413 network connectivity. The first metric, network size (the number of enhancers) is  
414 equivalent or similar to the sum of the individual constituent enhancers in an enhancer  
415 cluster reported in previous studies, such as multiple enhancers (Osterwalder et al.,  
416 2018), domains of regulatory chromatin (DORCs) (Ma et al., 2020), regulatory locus  
417 complexity (Gonzalez et al., 2015) or super-enhancers (Hnisz et al., 2013). However,  
418 the second metric, network connectivity (the frequency of PEIs), measuring the  
419 potential enhancer interactions based on their chromatin co-accessibility, differs from  
420 these existing studies. Thus, the enhancer network not only delineates the mapping  
421 between enhancers and the target gene, but also clarifies the underlying regulatory  
422 relationship between enhancers. We applied eNet in various biological systems and  
423 found the number of enhancers in the network was correlated with the importance of  
424 target genes, which was expected and consistent with previous studies (Gonzalez et  
425 al., 2015; Hnisz et al., 2013; Ma et al., 2020; Osterwalder et al., 2018). Strikingly, we  
426 further found that network connectivity had the best performance in predicting cell  
427 identity and disease genes, where the network hub enhancers are the most  
428 functionally important in the network. The enhancer networks concept might be also  
429 helpful to interpret the phase separation model for gene regulation (Sabari et al., 2018),  
430 *e.g.* whether the genes regulated by Complex mode are more likely to form the phase  
431 separation or whether network hub enhancers play a role in mediating the phase  
432 separation.

433 In network science, the hierarchical organization, or hub-and-spoke network, is  
434 robust to random failures, as only the failure of its central hub node can break the  
435 network into isolated components (Barabasi, 2016). However, it has a low tolerance to  
436 an attack that removes its central hub. Thus, we wondered whether connections

437 between non-hub enhancers are dispensable in enhancer networks. To this end, we  
438 quantified the network connectivity in an alternative way by maximum degrees of  
439 nodes in the network, which represented the importance of the central hub node in a  
440 network, termed as network connectivity (maximum), instead of by average degrees  
441 of nodes in the network as described above, termed as network connectivity (average).  
442 Surprisingly, we observed that the performance of the network connectivity (maximum)  
443 markedly decreased in the prediction of both cell identity and disease genes,  
444 compared to network connectivity (average) (**Figure S7B** and **S7C**). It suggested that  
445 the connections between non-hub enhancers are also indispensable in the enhancer  
446 network, which further complements our previous model based on Hi-C chromatin  
447 interactions(Huang et al., 2018). We speculated that by connecting some of non-hub  
448 nodes, the reinforced network model has a higher tolerance to targeted attacks, where  
449 the removal of the hub does not fragment the network. In this way, enhancer networks  
450 provide the robustness in biological systems to random failures (e.g. transcriptional  
451 noise) as well as attack on the central network hub enhancers (e.g. genetic mutation).

452 Taken together, the concept of complexity of enhancer networks allows us to  
453 identify key cell identity and disease genes and to explore the underlying mechanisms,  
454 such as how constituent enhancers interact with each other to regulate gene  
455 expression.

456

### 457 ***Super-enhancers in gene regulation***

458 Super-enhancers exhibit disproportionately higher signals for the enhancer marks  
459 (such as H3K27ac and binding of Mediator and TFs), which control cell identity and  
460 disease genes (Hnisz et al., 2013). While SEs have attracted enormous interest in  
461 further studying these interesting regulatory elements, it remains datable on how  
462 functionally and mechanistically distinct a super-enhancer is from a typical enhancer  
463 as they are defined operationally but not functionally (Blobel et al., 2021; Pott and Lieb,  
464 2015). For example, the current dissection of individual enhancers suggests that the  
465 mechanistic relationships among constituent enhancers of SEs are highly diverse and

466 heterogeneous, such as cooperative, redundant, hierarchical, or temporal (Bahr et al.,  
467 2018; Cai et al., 2020; Canver et al., 2015; Fulco et al., 2016; Hay et al., 2016; Huang  
468 et al., 2016; Kai et al., 2021; Shin et al., 2016). Here, we found SEs can be subdivided  
469 into two groups SE-only (SEs without network structure) and Complex SEs (SEs with  
470 network structure), which displayed different in chromatin co-accessibility between the  
471 constituent enhancers, irrespective of their indistinguishable chromatin accessibility.  
472 Thus, this distinct feature, with or without network structure, might explain their diverse  
473 and heterogeneous mechanisms. Furthermore, SEs are identified computationally by  
474 the linear clustering of individual components in the genome (Hnisz et al., 2013). This  
475 ignores the observation that a gene can be regulated by multiple enhancers which are  
476 not constrained by linear genome distances. In contrast, eNet assigns each individual  
477 enhancer to its potential target gene based on the correlation between gene  
478 expression and enhancer accessibility across various cells (**Figure 1B**). This approach  
479 identifies a more complete set of the enhancers that regulate a specific gene,  
480 irrespective of the distance between enhancers.

481

### 482 ***Enhancer networks in single cells***

483 Currently, most studies on enhancer clusters rely on chromatin marks and the binding  
484 of Mediator and TFs at bulk population (Hnisz et al., 2013). It remains largely unknown  
485 whether enhancer clusters control robust gene expression simply through population  
486 averaging. The development of scATAC-seq and scRNA-seq technologies generated  
487 a large amount of single cell multi-omics profiles in various biological systems  
488 (Argelaguet et al., 2019; Granja et al., 2019; Sarropoulos et al., 2021; Trevino et al.,  
489 2021) could be leveraged towards addressing this question. However, these studies  
490 have largely focused on connecting distal enhancers with their target genes, but rarely  
491 on exploring the underlying regulatory relationships among enhancers regulating the  
492 same gene, namely, the enhancer networks in this study. Here, as the primary feature  
493 distinguishing our work from these studies, eNet allows us to explore how individual  
494 elements interact with each other to control gene expression during lineage

495 commitment at single-cell resolution, as illustrating by the example of *PAX5* enhancer  
496 network. As the second advantage, by building enhancer networks based on single  
497 cell multi-omics data, eNet is an unsupervised approach to simultaneously identify key  
498 cell identity and disease genes and the underlying enhancer regulatory relationships.  
499 Thus, it is not necessary to know the cell identity in advance from primary samples or  
500 conduct challenging experimental steps, such as cell subpopulation isolation and  
501 chromatin immunoprecipitation sequencing (ChIP-seq).

502

### 503 **Limitations**

504 The primary limitation of our work is the lack of experimental validation on the  
505 regulatory role of enhancer networks during development and disease. In a parallel  
506 study, Shu et al. performed LacZ transgenic mouse assay and *in vivo* enhancer  
507 perturbation by CRISPR/Cas9-mediated genome editing and found that the network  
508 hub enhancers played a central role in orchestrating spatiotemporal gene expression  
509 programs of *Atoh1* during spinal cord development (also see “related manuscript file”  
510 for details). Fully determining the regulatory roles of enhancer networks requires more  
511 comprehensive investigations in future, such as combining epigenetic features,  
512 chromatin looping, reporter assays, and enhancer perturbations in relevant cell lines,  
513 and *in vivo* models. Moreover, one of the motivations of our study is that it currently  
514 remains difficult and costly to capture genome-wide chromatin interactions at high-  
515 resolution by proximity ligation-based methods for the analysis of enhancer  
516 interactions (Lieberman-Aiden et al., 2009; Mumbach et al., 2017; Tang et al., 2015).  
517 To address this question, eNet builds enhancer networks based on the assumption  
518 that the Cicero-detected significant co-accessible pairs (Pliner et al., 2018), the  
519 predicted enhancer interactions (PEIs) used in this study, are overall concordant with  
520 proximity ligation-based chromatin interactions. Analysis in GM12878 cell line revealed  
521 network hub enhancers overlapped with part of Hi-C hub enhancers. Meanwhile, it  
522 captured significant fraction of distinct enhancers, which were functionally important.  
523 While it might be due to the limited resolution of current Hi-C data (Rao et al., 2014), it



524 is also important to recognize that inconsistencies exist between these two  
525 measurements. Thus, it is important to systematically compare the coherence of the  
526 enhancer networks from scATAC-seq with those from proximity ligation-based  
527 chromatin interactions at higher resolution. In this sense, eNet can be easily applied  
528 to high-resolution chromatin interaction data, if available in the future.

529

530

531

## 532 **Materials and Methods**

### 533 **Data Sources**

534 The scATAC-seq and scRNA-seq datasets used in this study were obtained from  
535 the literature. The human blood dataset includes single cell profiling of gene  
536 expression and chromatin accessibility in human primary bone marrow and peripheral  
537 blood mononuclear cells measured by the Chromium platform (10x Genomics)(Granja  
538 et al., 2019). The mouse skin dataset contains the single cell profiling of gene  
539 expression and chromatin accessibility during mouse skin development measured by  
540 SHARE-seq(Ma et al., 2020). The mouse cerebral cortex dataset consists of the single  
541 cell profiling of gene expression and chromatin accessibility of developing mouse  
542 cerebral cortex measured by SNARE-seq(Chen et al., 2019). The human fetal kidney  
543 and heart datasets include single cell profiling of gene expression and chromatin  
544 accessibility of human fetal kidney and heart measured by sci-ATAC-seq3(Domcke et  
545 al., 2020) and sci-RNA-seq3(Cao et al., 2020).A list of all used datasets and accession  
546 numbers are summarized in **Table S1**.

547

### 548 **eNet**

549 eNet is an algorithm to build enhancer networks for clustered enhancers  
550 controlling the same gene based on scATAC-seq and scRNA-seq datasets. Briefly, it  
551 contains the following six steps.

#### 552 ***Step 1. Preparing input matrix (Input)***

553 In this study, the processed single cell chromatin accessibility and gene  
554 expression matrix data were downloaded directly from public literatures and used as  
555 the input for eNet.

#### 556 ***Step 2. Identifying the putative enhancer cluster (Node)***

557 The chromatin accessible regions outside of  $\pm 2$  kb of transcriptional start sites  
558 (TSS) were considered enhancers. We identified a set of enhancers, as the nodes in  
559 the network, which putatively regulate a specific target gene based on the correlation

560 between gene expression and enhancer accessibility across various cells by adapting  
561 the method previously described (Li et al., 2021; Ma et al., 2020), with some  
562 modifications. Briefly, given a gene, we first selected the enhancers located within a  $\pm$   
563 100 kb window around each annotated TSS as enhancer candidates. For each gene-  
564 enhancer pair, we then calculated the Spearman correlation between enhancer  
565 chromatin accessibility and gene expression. The Spearman correlations were z-score  
566 normalized using genome-wide gene-enhancer pairs as the background. Lastly, by  
567 defining a cut-off at the z-score with an empirically defined significance threshold of  $p$ -  
568 value  $< 0.01$  (one-sided Student's  $t$ -test), we identified a putative enhancer cluster  
569 regulating the specific target gene.

### 570 ***Step 3. Identifying the predicted enhancer interactions (Edge)***

571 We determined the potential chromatin interactions between enhancers within  
572 each putative enhancer cluster as the edges of the network. The chromatin co-  
573 accessibility of enhancer pairs across various cells was calculated using Cicero (Pliner  
574 et al., 2018), a method that predicts cis-regulatory DNA interactions from single-cell  
575 chromatin accessibility data. By applying a threshold value of the co-accessibility  
576 calculated, we determined the significant co-accessible enhancer pairs, termed as the  
577 predicted enhancer interactions (PEIs).

### 578 ***Step 4. Building enhancer networks (Network)***

579 We built a binary adjacency matrix to represent the predicted enhancer  
580 interactions for each putative enhancer cluster, where 1 or 0 represent two enhancers  
581 with or without predicted enhancer interactions, respectively. Thus, the adjacency  
582 matrix can be visualized as an enhancer network, where nodes represent enhancers  
583 and the edges represent PEIs.

### 584 ***Step 5. Calculating network complexity (Network complexity)***

585 We evaluated the complexity of the enhancer networks by the network size and  
586 connectivity. Network size was quantified by the quantity of nodes in the network.  
587 Network connectivity was quantified by the average degree (Barabasi, 2016), which  
588 were calculated as two-fold of the number of edges and divided by the number of

589 nodes.

#### 590 ***Step 6. Classification of enhancer networks (Mode)***

591 We built the enhancer network for each gene genome-wide by repeating from  
592 steps 1-5. Then, by applying a threshold value of network size and connectivity, we  
593 can classify the enhancer networks into several groups: Complex (large size and high  
594 connectivity), Multiple (large size but low connectivity), Simple (small size and low  
595 connectivity) and others (small size but high connectivity, not discussed due to limited  
596 cases).

597

#### 598 ***Defining network hub enhancers for enhancer networks in Complex mode***

599 In Complex mode, we calculated the node degree for each enhancer and  
600 normalized them by the total number of edges in network, termed as normalized node  
601 degree. By applying a threshold value of the normalized node degree, we divided the  
602 enhancers into two groups, termed as network hub enhancers and non-hub enhancers,  
603 where network hub enhancers are those with high frequency of PEIs.

604

#### 605 **Robustness analysis of eNet**

#### 606 ***Building weighted enhancer network in Step 4***

607 In additional to the binary adjacency matrix in Step 4, we also built the weighted  
608 co-accessibility enhancer networks and evaluated the performance of the complexity  
609 of weighted network connectivity in predicting cell identity and disease genes. It  
610 resulted in not obvious difference between two methods (**Figure S1E-S1G**).

#### 611 ***Quantifying network connectivity in Step 5***

612 In **Figure S7B** and **S7C**, we quantified the network connectivity by an alternative  
613 method using the maximum degrees of nodes in network, termed the network  
614 connectivity (maximum) hereafter. Algorithmically, these two metrics, network  
615 connectivity (average) and network connectivity (maximum), are distinguished by in  
616 without or with considering the connections between non-hub enhancers.

#### 617 ***Thresholds to classify enhancer networks in Step 6***

618 To test the robustness of thresholds of network size and network connectivity in  
619 defining Complex, Multiple and Simple mode, we set different thresholds and  
620 calculated the enrichment of cell identity and disease genes (**Figure S2**).

#### 621 ***The relationship of the network connectivity and network size***

622 To decouple the network size and network connectivity, we ranked the enhancer  
623 networks based on the network size and separated them into 5 groups from high to  
624 low, which resulted in similar network size level within each group (**Figure S3A**).

625 Then we compared the network connectivity and cell identity/disease genes  
626 enrichment of the Complex and Multiple networks in each group (**Figure S3B-S3D**).

#### 627 ***The relationship of the network connectivity and chromatin accessibility***

628 To decouple the chromatin accessibility and network connectivity, we grouped the  
629 enhancer networks into 5 groups based on the average chromatin accessibility of the  
630 enhancers within each network from high to low, which resulted in similar chromatin  
631 accessibility level within each group (**Figure S4A**). Then we compared the network  
632 connectivity and cell identity/disease genes enrichment of the Complex and Multiple  
633 networks in each group (**Figure S4B-S4D**).

634

#### 635 **Retrieval of cell identity and disease genes**

636 The blood-related cell identity genes were retrieved from the website  
637 ([https://www.biolegend.com/cell\\_markers](https://www.biolegend.com/cell_markers)) and (Ranzoni et al., 2021). The blood-  
638 related disease genes were from DisGeNET (Pinero et al., 2017). The skin-related cell  
639 identity genes were from (Ma et al., 2020). The skin-related disease genes were from  
640 MalaCards (<https://www.malacards.org>), OMIM (<https://omim.org>) and DisGeNET  
641 (Pinero et al., 2017). The neuron-related cell identity genes were retrieved from (Chen  
642 et al., 2019; Zhu et al., 2019). The neuron-related disease genes were from DisGeNET  
643 (Pinero et al., 2017). The kidney-related and heart-related cell identity genes were  
644 retrieved from (Domcke et al., 2020). The kidney-related and heart-related disease  
645 genes were from DisGeNET (Pinero et al., 2017). The skin-related cell identity genes  
646 were from (Ma et al., 2020). All these cell identity and disease genes are provided in

647 **Table S3.**

648

649 **Enrichment analysis of cell identity and disease genes**

650 We performed cell identity and disease genes enrichment analysis for gene  
651 groups in Complex, Multiple and Simple modes. Briefly, given a gene group, the  
652 enrichment score was calculated as the fold enrichment relative to the genome  
653 background. The computing method was determined as:

654 
$$(m/n)/(M/N)$$

655 where  $m$  and  $M$  represent the number of cell identity genes within the group and  
656 genome-wide, respectively, and  $n$  and  $N$  represent the number of genes within the  
657 group and genome-wide, respectively.

658

659 **Performance evaluation in predicting cell identity and disease genes**

660 To evaluate the performance of enhancer networks in predicting the cell identity  
661 and disease genes, we ranked all genes by various scoring methods, including  
662 network connectivity, network size, and overall chromatin accessibility. We then  
663 calculated the fold-enrichment of cell identity or disease genes in top ranked genes  
664 with a moving window of 50, using the whole genome as the background. The  $p$ -value,  
665 indicating the significance of the difference in performance between the two scoring  
666 methods, was determined based on the enrichment in the top 50 genes.

667

668 **Enrichment analysis of GWAS SNPs**

669 The SNPs curated in the GWAS Catalog (Welter et al., 2014) were downloaded  
670 through the UCSC Table Browser (<http://genome.ucsc.edu/>). In addition, we curated a  
671 list of cell type related GWAS SNPs using a semi-automatic text mining method as  
672 described below.

673 ***Blood-related GWAS SNPs***

674 The subset of blood-related GWAS SNPs was selected as those associated with  
675 at least one of the following keywords in the 'trait' field: 'Erythrocyte', 'F-cell', 'HbA2',

676 'Hematocrit', 'Hematological', 'Hematology', 'Hemoglobin', 'Platelet', 'Blood', 'Anemia',  
677 'Sickle cell disease', 'Thalassemia', 'Leukemia', 'Lymphoma', 'Lymphocyte', 'B cell', 'B-  
678 cell', 'Lymphoma', 'Lymphocyte', and 'White blood cell'.

#### 679 ***B cell-related GWAS SNPs***

680 The subset of blood-related GWAS SNPs was selected as those associated with  
681 at least one of the following keywords in the 'trait' field: 'Blood', 'B cell', 'B-cell',  
682 'Lymphoma', 'Lymphocyte'.

#### 683 ***Skin-related GWAS SNPs***

684 The subset of skin-related GWAS SNPs was selected as those associated with at  
685 least one of the following keywords in the 'trait' field: 'Skin', 'Acne', 'Areata', 'Dermatitis',  
686 'Pemphigus', 'Psoriasis', 'Rosacea', 'Scleroderma', 'Vitiligo'.

#### 687 ***Cerebral-related GWAS SNPs***

688 The subset of neuron-related GWAS SNPs was selected as those associated with  
689 at least one of the following keywords in the 'trait' field: 'Amyotrophic lateral sclerosis',  
690 'Parkinson's disease', 'Attention deficit', 'Anorexia', 'Type 1 diabetes', 'Ulcerative  
691 colitis', 'Menarche', 'Depressed affect', 'Intelligence', 'sclerosis', 'Insomnia',  
692 'Menopause', 'Artery disease', 'Educational attainment', 'Cerebral', 'Ischemic', 'Spastic  
693 Diplegia', 'Malaria', 'Aneurysm', 'Cortex', 'Spastic Quadriplegia', 'Band Heterotopia',  
694 'Cerebrovascular Disease', 'Arteriovenous Malformations of the Brain', 'Spastic  
695 Hemiplegia', 'Intracranial Embolism', 'Brain Edema', 'Brain Injury',  
696 'Adrenoleukodystrophy', 'Intracranial Thrombosis', 'Seizure Disorder', 'Depression',  
697 'Encephalopathy', 'Arteriovenous Malformation', 'Cardiac Arrest', 'Cerebritis',  
698 'Mitochondrial DNA Depletion Syndrome 4a', 'Hypoxia', 'Thrombosis', 'Developmental  
699 and Epileptic Encephalopathy 39', 'Hemorrhage', 'Intracerebral', 'Schizophrenia', and  
700 'Spasticity'.

#### 701 ***Kidney-related GWAS SNPs***

702 The subset of kidney-related GWAS SNPs was selected as those associated with  
703 at least one of the following keywords in the 'trait' field: 'Kidney', 'Kidney Disease',  
704 'nephridium', 'Renal', 'Renal Cell Carcinoma', 'Nonpapillary', 'Kidney Cancer',

705 'Autosomal Dominant Polycystic Kidney Disease', 'Tukel Syndrome',  
706 'Leiomyosarcoma', 'Muscle Cancer', 'Smooth Muscle Tumor', 'Nephrolithiasis', 'Kidney  
707 stones', 'Membranous nephropathy', 'Urinary metabolite levels in chronic kidney  
708 disease', 'Estimated glomerular filtration rate'.

### 709 ***Heart-related GWAS SNPs***

710 The subset of heart-related GWAS SNPs was selected as those associated with  
711 at least one of the following keywords in the 'trait' field: 'heart Disease', 'Dry heart  
712 Syndrome Cataract', 'Fish-heart Disease', 'Aland Island heart Disease Cat heart  
713 Syndrome', 'Muscle heart Brain Disease', 'Ocular Cancer Myopia', 'Myopia',  
714 'Keratoconjunctivitis Sicca', 'Conjunctivitis', 'Sjogren Syndrome', 'Retinal Detachment',  
715 'Microvascular Complications of Diabetes 5', 'Open-Angle Glaucoma Refractive Error'.

### 716 ***Enrichment analysis***

717 For each dataset, the enhancers were converted to hg38 genomic coordinates  
718 using the liftOver software from the UCSC Genome Browser  
719 (<http://genome.ucsc.edu/cgi-bin/hgLiftOver>). The overlap between loci and GWAS  
720 SNPs was performed using bedtools intersect (Quinlan and Hall, 2010). In short, for  
721 enhancers in each group, the enrichment score was calculated as the fold enrichment  
722 relative to the genome background. The computing method was listed as following:

$$723 \quad (m/n)/(M/N)$$

724 where  $m$  and  $M$  represent the number of SNPs within the group and genome-wide,  
725 respectively, and  $n$  and  $N$  represent the number of loci within the group and genome-  
726 wide, respectively. The genome-wide background is generated from a list of loci  
727 obtained by randomly shuffling the list of regular enhancers.

728

### 729 ***Sequence conservation score***

730 PhastCons 100-way vertebrate conservation scores were downloaded from the  
731 UCSC Genome Browser (Siepel et al., 2005). We calculated the mean PhastCons  
732 score for each enhancer as previously described (Sarropoulos et al., 2021).

733



## 734 **Comparison of PEIs and Hi-C chromatin interactions**

735 High-resolution Hi-C data in GM12878 cell was obtained from the literature (Rao  
736 et al., 2014). The statistically significant chromatin interactions were detected as  
737 previously described (Huang et al., 2018). We compared the enrichment of chromatin  
738 interactions detected by Hi-C in enhancer pairs with different co-accessibility (**Figure**  
739 **4A**).

740

## 741 **Comparison of enhancer networks based on PEIs and Hi-C chromatin** 742 **interactions in GM12878 cell line**

743 We mapped Hi-C chromatin interactions to the enhancer clusters defined by single  
744 cell GM12878 data to replace the PEIs by using bedtools map, then built enhancer  
745 networks, evaluated the complexity of enhancer networks and defined network hub  
746 enhancers following the workflow in eNet analysis.

747

## 748 **Trajectory analysis**

749 We performed trajectory analysis for B cell differentiation using the method  
750 previously described (Satpathy et al., 2019) to order cells in pseudotime.

751

## 752 **Cell type-specific enhancer networks**

753 To build cell type specific enhancer networks (**Figure 5**), we used the enhancer  
754 accessibility and gene expression matrix from a specific cell type as the input for eNet  
755 algorithm. The gene expression and chromatin accessibility of cell type-specific  
756 enhancer network, were represented by their average across all cells per cell type,  
757 followed by min-max normalization.

758

## 759 **Pseudotime difference between gene expression and enhancer networks**

760 To compare the dynamics of gene expression enhancer networks, we quantified  
761 the difference of the pseudotime of B cell differentiation between the onset of gene  
762 expression and establishment of the enhancer network. We focused on genes highly

763 expressed in preB or B cells and controlled by enhancer networks in Complex mode  
764 across B cell differentiation pseudotime. First, for each single cell, we assigned the  
765 gene expression, network connectivity, and chromatin accessibility based on their cell  
766 type annotations, which were further smoothed by applying a sliding window of 50 cells  
767 along the pseudotime. We then defined the time of gene expression onset and  
768 enhancer network establishment, measured by chromatin accessibility or network  
769 connections, at the first instance of the smoothed value being larger than the  
770 predefined value. Finally, the pseudotime lag was calculated as the time of gene  
771 expression onset subtracted by the time of enhancer network establishment.

772

### 773 **Blood-related SEs**

774 The SEs list associated with blood-related cell types from the dbSUPER database  
775 (Khan and Zhang, 2016) was curated into a catalog of blood-related SEs (**Table S4**).  
776 We first downloaded the corresponding SE list from dbSUPER, sorted, and merged  
777 into an SE list using bedtools (Quinlan and Hall, 2010). In this way, we generated 2,306  
778 human blood-related SEs in total.

779

### 780 **Gene Ontology (GO) enrichment analysis**

781 Gene Ontology (GO) enrichment analysis of enhancer network target genes was  
782 performed by clusterProfiler package (Yu et al., 2012).

783

### 784 **Data availability**

785 All datasets analyzed in this study were published previously. The corresponding  
786 descriptions and GEO number are described in the **Table S1**.

787

### 788 **Code availability**

789 The full code of eNet was provided in the **Supplementary material** and made  
790 available via GitHub, see <https://github.com/xmuhuanglab/eNet>.

791

792 **Competing interests**

793 The authors declare no competing interests.

794

795 **Authors' contributions**

796 D.H. and J.H. conceived and designed the study. D.H., H.L., L.L. and M.T.  
797 performed the computational analysis. D.H., H.L., L.L., M.S., J.D., F.L. and J.H. wrote  
798 the manuscript. J.H. supervised the study.

799

800 **Acknowledgements**

801 We thank the useful comments from Drs. Guo-Cheng Yuan, Jian Xu and the  
802 members in J.H. lab. This work was supported by the National Natural Science  
803 Foundation of China (31871317, 32070635, 82002529, 81891000 and 81891002) and  
804 Natural Science Foundation of Fujian Province of China (2020J01028 and  
805 2020J05012), and the Strategic Priority Research Program of the Chinese Academy  
806 of Sciences (XDA16040000).

807

## 808 **References**

- 809 Argelaguet, R., Clark, S.J., Mohammed, H., Stapel, L.C., Krueger, C., Kapourani, C.A., Imaz-  
810 Rosshandler, I., Lohoff, T., Xiang, Y., Hanna, C.W., *et al.* (2019). Multi-omics profiling of mouse  
811 gastrulation at single-cell resolution. *Nature* *576*, 487-491.
- 812 Bahr, C., von Paleske, L., Uslu, V.V., Remeseiro, S., Takayama, N., Ng, S.W., Murison, A., Langenfeld,  
813 K., Petretich, M., Scognamiglio, R., *et al.* (2018). A Myc enhancer cluster regulates normal and  
814 leukaemic haematopoietic stem cell hierarchies. *Nature* *553*, 515-520.
- 815 Banerji, J., Rusconi, S., and Schaffner, W. (1981). Expression of a beta-globin gene is enhanced by  
816 remote SV40 DNA sequences. *Cell* *27*, 299-308.
- 817 Barabasi, A.-L. (2016). *Network Science* (Cambridge University Press).
- 818 Blobel, G.A., Higgs, D.R., Mitchell, J.A., Notani, D., and Young, R.A. (2021). Testing the super-  
819 enhancer concept. *Nat Rev Genet.*
- 820 Buenrostro, J.D., Wu, B., Litzenburger, U.M., Ruff, D., Gonzales, M.L., Snyder, M.P., Chang, H.Y., and  
821 Greenleaf, W.J. (2015). Single-cell chromatin accessibility reveals principles of regulatory variation.  
822 *Nature* *523*, 486-490.
- 823 Cai, W., Huang, J., Zhu, Q., Li, B.E., Seruggia, D., Zhou, P., Nguyen, M., Fujiwara, Y., Xie, H., Yang, Z.,  
824 *et al.* (2020). Enhancer dependence of cell-type-specific gene expression increases with  
825 developmental age. *Proc Natl Acad Sci U S A* *117*, 21450-21458.
- 826 Canver, M.C., Smith, E.C., Sher, F., Pinello, L., Sanjana, N.E., Shalem, O., Chen, D.D., Schupp, P.G.,  
827 Vinjamur, D.S., Garcia, S.P., *et al.* (2015). BCL11A enhancer dissection by Cas9-mediated in situ  
828 saturating mutagenesis. *Nature* *527*, 192-197.
- 829 Cao, J., Cusanovich, D.A., Ramani, V., Aghamirzaie, D., Pliner, H.A., Hill, A.J., Daza, R.M., McFaline-  
830 Figueroa, J.L., Packer, J.S., Christiansen, L., *et al.* (2018). Joint profiling of chromatin accessibility  
831 and gene expression in thousands of single cells. *Science* *361*, 1380-1385.
- 832 Cao, J., O'Day, D.R., Pliner, H.A., Kingsley, P.D., Deng, M., Daza, R.M., Zager, M.A., Aldinger, K.A.,  
833 Blecher-Gonen, R., Zhang, F., *et al.* (2020). A human cell atlas of fetal gene expression. *Science*  
834 *370*.
- 835 Carleton, J.B., Berrett, K.C., and Gertz, J. (2017). Multiplex Enhancer Interference Reveals  
836 Collaborative Control of Gene Regulation by Estrogen Receptor alpha-Bound Enhancers. *Cell Syst*  
837 *5*, 333-344 e335.
- 838 Chen, S., Lake, B.B., and Zhang, K. (2019). High-throughput sequencing of the transcriptome and  
839 chromatin accessibility in the same cell. *Nat Biotechnol* *37*, 1452-1457.
- 840 Chen, X., Zhou, J., Zhang, R., Wong, A.K., Park, C.Y., Theesfeld, C.L., and Troyanskaya, O.G. (2021).  
841 Tissue-specific enhancer functional networks for associating distal regulatory regions to disease.  
842 *Cell Syst* *12*, 353-362 e356.
- 843 Consortium, E.P. (2012). An integrated encyclopedia of DNA elements in the human genome.  
844 *Nature* *489*, 57-74.
- 845 Dixon, J.R., Selvaraj, S., Yue, F., Kim, A., Li, Y., Shen, Y., Hu, M., Liu, J.S., and Ren, B. (2012).  
846 Topological domains in mammalian genomes identified by analysis of chromatin interactions.  
847 *Nature* *485*, 376-380.
- 848 Domcke, S., Hill, A.J., Daza, R.M., Cao, J., O'Day, D.R., Pliner, H.A., Aldinger, K.A., Pokholok, D.,  
849 Zhang, F., Milbank, J.H., *et al.* (2020). A human cell atlas of fetal chromatin accessibility. *Science*  
850 *370*.

851 Fulco, C.P., Munschauer, M., Anyoha, R., Munson, G., Grossman, S.R., Perez, E.M., Kane, M., Cleary,  
852 B., Lander, E.S., and Engreitz, J.M. (2016). Systematic mapping of functional enhancer-promoter  
853 connections with CRISPR interference. *Science* *354*, 769-773.

854 Gasperini, M., Tome, J.M., and Shendure, J. (2020). Towards a comprehensive catalogue of  
855 validated and target-linked human enhancers. *Nat Rev Genet*.

856 Gonzalez, A.J., Setty, M., and Leslie, C.S. (2015). Early enhancer establishment and regulatory locus  
857 complexity shape transcriptional programs in hematopoietic differentiation. *Nat Genet* *47*, 1249-  
858 1259.

859 Granja, J.M., Klemm, S., McGinnis, L.M., Kathiria, A.S., Mezger, A., Corces, M.R., Parks, B., Gars, E.,  
860 Liedtke, M., Zheng, G.X.Y., *et al.* (2019). Single-cell multiomic analysis identifies regulatory  
861 programs in mixed-phenotype acute leukemia. *Nat Biotechnol* *37*, 1458-1465.

862 Hay, D., Hughes, J.R., Babbs, C., Davies, J.O.J., Graham, B.J., Hanssen, L., Kassouf, M.T., Marieke  
863 Oudelaar, A.M., Sharpe, J.A., Suciu, M.C., *et al.* (2016). Genetic dissection of the alpha-globin  
864 super-enhancer in vivo. *Nat Genet* *48*, 895-903.

865 Hnisz, D., Abraham, B.J., Lee, T.I., Lau, A., Saint-Andre, V., Sigova, A.A., Hoke, H.A., and Young, R.A.  
866 (2013). Super-enhancers in the control of cell identity and disease. *Cell* *155*, 934-947.

867 Huang, J., Li, K., Cai, W., Liu, X., Zhang, Y., Orkin, S.H., Xu, J., and Yuan, G.C. (2018). Dissecting  
868 super-enhancer hierarchy based on chromatin interactions. *Nat Commun* *9*, 943.

869 Huang, J., Liu, X., Li, D., Shao, Z., Cao, H., Zhang, Y., Trompouki, E., Bowman, T.V., Zon, L.I., Yuan,  
870 G.C., *et al.* (2016). Dynamic Control of Enhancer Repertoires Drives Lineage and Stage-Specific  
871 Transcription during Hematopoiesis. *Dev Cell* *36*, 9-23.

872 Huang, J., Marco, E., Pinello, L., and Yuan, G.C. (2015). Predicting chromatin organization using  
873 histone marks. *Genome Biol* *16*, 162.

874 Jinek, M., Chylinski, K., Fonfara, I., Hauer, M., Doudna, J.A., and Charpentier, E. (2012). A  
875 programmable dual-RNA-guided DNA endonuclease in adaptive bacterial immunity. *Science* *337*,  
876 816-821.

877 Kai, Y., Li, B.E., Zhu, M., Li, G.Y., Chen, F., Han, Y., Cha, H.J., Orkin, S.H., Cai, W., Huang, J., *et al.*  
878 (2021). Mapping the evolving landscape of super-enhancers during cell differentiation. *Genome*  
879 *Biol* *22*, 269.

880 Khan, A., and Zhang, X. (2016). dbSUPER: a database of super-enhancers in mouse and human  
881 genome. *Nucleic Acids Res* *44*, D164-171.

882 Lambert, S.A., Jolma, A., Campitelli, L.F., Das, P.K., Yin, Y., Albu, M., Chen, X., Taipale, J., Hughes,  
883 T.R., and Weirauch, M.T. (2018). The Human Transcription Factors. *Cell* *172*, 650-665.

884 Lara-Astiaso, D., Weiner, A., Lorenzo-Vivas, E., Zaretzky, I., Jaitin, D.A., David, E., Keren-Shaul, H.,  
885 Mildner, A., Winter, D., Jung, S., *et al.* (2014). Immunogenetics. Chromatin state dynamics during  
886 blood formation. *Science* *345*, 943-949.

887 Li, Y.E., Preissl, S., Hou, X., Zhang, Z., Zhang, K., Qiu, Y., Poirion, O.B., Li, B., Chiou, J., Liu, H., *et al.*  
888 (2021). An atlas of gene regulatory elements in adult mouse cerebrum. *Nature* *598*, 129-136.

889 Lieberman-Aiden, E., van Berkum, N.L., Williams, L., Imakaev, M., Ragozcy, T., Telling, A., Amit, I.,  
890 Lajoie, B.R., Sabo, P.J., Dorschner, M.O., *et al.* (2009). Comprehensive mapping of long-range  
891 interactions reveals folding principles of the human genome. *Science* *326*, 289-293.

892 Liu, X., Chen, Y., Zhang, Y., Liu, Y., Liu, N., Botten, G.A., Cao, H., Orkin, S.H., Zhang, M.Q., and Xu, J.  
893 (2020). Multiplexed capture of spatial configuration and temporal dynamics of locus-specific 3D  
894 chromatin by biotinylated dCas9. *Genome Biol* *21*, 59.

895 Liu, X., Zhang, Y., Chen, Y., Li, M., Zhou, F., Li, K., Cao, H., Ni, M., Liu, Y., Gu, Z., *et al.* (2017). In Situ  
896 Capture of Chromatin Interactions by Biotinylated dCas9. *Cell* *170*, 1028-1043 e1019.

897 Long, H.K., Prescott, S.L., and Wysocka, J. (2016). Ever-Changing Landscapes: Transcriptional  
898 Enhancers in Development and Evolution. *Cell* *167*, 1170-1187.

899 Ma, S., Zhang, B., LaFave, L.M., Earl, A.S., Chiang, Z., Hu, Y., Ding, J., Brack, A., Kartha, V.K., Tay, T.,  
900 *et al.* (2020). Chromatin Potential Identified by Shared Single-Cell Profiling of RNA and Chromatin.  
901 *Cell* *183*, 1103-1116 e1120.

902 Malin, J., Aniba, M.R., and Hannonhalli, S. (2013). Enhancer networks revealed by correlated DNase  
903 hypersensitivity states of enhancers. *Nucleic Acids Res* *41*, 6828-6838.

904 Maurano, M.T., Humbert, R., Rynes, E., Thurman, R.E., Haugen, E., Wang, H., Reynolds, A.P.,  
905 Sandstrom, R., Qu, H., Brody, J., *et al.* (2012). Systematic localization of common disease-  
906 associated variation in regulatory DNA. *Science* *337*, 1190-1195.

907 Mumbach, M.R., Satpathy, A.T., Boyle, E.A., Dai, C., Gowen, B.G., Cho, S.W., Nguyen, M.L., Rubin,  
908 A.J., Granja, J.M., Kazane, K.R., *et al.* (2017). Enhancer connectome in primary human cells identifies  
909 target genes of disease-associated DNA elements. *Nat Genet* *49*, 1602-1612.

910 Neph, S., Vierstra, J., Stergachis, A.B., Reynolds, A.P., Haugen, E., Vernot, B., Thurman, R.E., John, S.,  
911 Sandstrom, R., Johnson, A.K., *et al.* (2012). An expansive human regulatory lexicon encoded in  
912 transcription factor footprints. *Nature* *489*, 83-90.

913 Osterwalder, M., Barozzi, I., Tissieres, V., Fukuda-Yuzawa, Y., Mannion, B.J., Afzal, S.Y., Lee, E.A.,  
914 Zhu, Y., Plajzer-Frick, I., Pickle, C.S., *et al.* (2018). Enhancer redundancy provides phenotypic  
915 robustness in mammalian development. *Nature* *554*, 239-243.

916 Perry, M.W., Boettiger, A.N., and Levine, M. (2011). Multiple enhancers ensure precision of gap  
917 gene-expression patterns in the *Drosophila* embryo. *Proc Natl Acad Sci U S A* *108*, 13570-13575.

918 Pinero, J., Bravo, A., Queralt-Rosinach, N., Gutierrez-Sacristan, A., Deu-Pons, J., Centeno, E.,  
919 Garcia-Garcia, J., Sanz, F., and Furlong, L.I. (2017). DisGeNET: a comprehensive platform  
920 integrating information on human disease-associated genes and variants. *Nucleic Acids Res* *45*,  
921 D833-D839.

922 Pliner, H.A., Packer, J.S., McFaline-Figueroa, J.L., Cusanovich, D.A., Daza, R.M., Aghamirzaie, D.,  
923 Srivatsan, S., Qiu, X., Jackson, D., Minkina, A., *et al.* (2018). Cicero Predicts cis-Regulatory DNA  
924 Interactions from Single-Cell Chromatin Accessibility Data. *Mol Cell* *71*, 858-871 e858.

925 Pott, S., and Lieb, J.D. (2015). What are super-enhancers? *Nat Genet* *47*, 8-12.

926 Quinlan, A.R., and Hall, I.M. (2010). BEDTools: a flexible suite of utilities for comparing genomic  
927 features. *Bioinformatics* *26*, 841-842.

928 Rada-Iglesias, A., Bajpai, R., Swigut, T., Brugmann, S.A., Flynn, R.A., and Wysocka, J. (2011). A  
929 unique chromatin signature uncovers early developmental enhancers in humans. *Nature* *470*, 279-  
930 283.

931 Ranzoni, A.M., Tangherloni, A., Berest, I., Riva, S.G., Myers, B., Strzelecka, P.M., Xu, J., Panada, E.,  
932 Mohorianu, I., Zaugg, J.B., *et al.* (2021). Integrative Single-Cell RNA-Seq and ATAC-Seq Analysis  
933 of Human Developmental Hematopoiesis. *Cell Stem Cell* *28*, 472-487 e477.

934 Rao, S.S., Huntley, M.H., Durand, N.C., Stamenova, E.K., Bochkov, I.D., Robinson, J.T., Sanborn, A.L.,  
935 Machol, I., Omer, A.D., Lander, E.S., *et al.* (2014). A 3D map of the human genome at kilobase  
936 resolution reveals principles of chromatin looping. *Cell* *159*, 1665-1680.

937 Sabari, B.R., Dall'Agnesse, A., Boija, A., Klein, I.A., Coffey, E.L., Shrinivas, K., Abraham, B.J., Hannett,  
938 N.M., Zamudio, A.V., Manteiga, J.C., *et al.* (2018). Coactivator condensation at super-enhancers  
939 links phase separation and gene control. *Science* *361*.

940 Sarropoulos, I., Sepp, M., Fromel, R., Leiss, K., Trost, N., Leushkin, E., Okonechnikov, K., Joshi, P.,  
941 Giere, P., Kutscher, L.M., *et al.* (2021). Developmental and evolutionary dynamics of cis-regulatory  
942 elements in mouse cerebellar cells. *Science* *373*.

943 Satpathy, A.T., Granja, J.M., Yost, K.E., Qi, Y., Meschi, F., McDermott, G.P., Olsen, B.N., Mumbach,  
944 M.R., Pierce, S.E., Corces, M.R., *et al.* (2019). Massively parallel single-cell chromatin landscapes of  
945 human immune cell development and intratumoral T cell exhaustion. *Nat Biotechnol* *37*, 925-936.

946 Schmitt, A.D., Hu, M., Jung, I., Xu, Z., Qiu, Y., Tan, C.L., Li, Y., Lin, S., Lin, Y., Barr, C.L., *et al.* (2016). A  
947 Compendium of Chromatin Contact Maps Reveals Spatially Active Regions in the Human Genome.  
948 *Cell Rep* *17*, 2042-2059.

949 Schoenfelder, S., and Fraser, P. (2019). Long-range enhancer-promoter contacts in gene  
950 expression control. *Nat Rev Genet* *20*, 437-455.

951 Shin, H.Y., Willi, M., HyunYoo, K., Zeng, X., Wang, C., Metser, G., and Hennighausen, L. (2016).  
952 Hierarchy within the mammary STAT5-driven Wap super-enhancer. *Nat Genet* *48*, 904-911.

953 Siepel, A., Bejerano, G., Pedersen, J.S., Hinrichs, A.S., Hou, M., Rosenbloom, K., Clawson, H., Spieth,  
954 J., Hillier, L.W., Richards, S., *et al.* (2005). Evolutionarily conserved elements in vertebrate, insect,  
955 worm, and yeast genomes. *Genome Res* *15*, 1034-1050.

956 Song, M., Pebworth, M.P., Yang, X., Abnousi, A., Fan, C., Wen, J., Rosen, J.D., Choudhary, M.N.K.,  
957 Cui, X., Jones, I.R., *et al.* (2020). Cell-type-specific 3D epigenomes in the developing human cortex.  
958 *Nature* *587*, 644-649.

959 Tang, F., Barbacioru, C., Wang, Y., Nordman, E., Lee, C., Xu, N., Wang, X., Bodeau, J., Tuch, B.B.,  
960 Siddiqui, A., *et al.* (2009). mRNA-Seq whole-transcriptome analysis of a single cell. *Nat Methods*  
961 *6*, 377-382.

962 Tang, Z., Luo, O.J., Li, X., Zheng, M., Zhu, J.J., Szalaj, P., Trzaskoma, P., Magalska, A., Wlodarczyk, J.,  
963 Rusczycki, B., *et al.* (2015). CTCF-Mediated Human 3D Genome Architecture Reveals Chromatin  
964 Topology for Transcription. *Cell* *163*, 1611-1627.

965 Thomas, H.F., Kotova, E., Jayaram, S., Pilz, A., Romeike, M., Lackner, A., Penz, T., Bock, C., Leeb, M.,  
966 Halbritter, F., *et al.* (2021). Temporal dissection of an enhancer cluster reveals distinct temporal  
967 and functional contributions of individual elements. *Mol Cell* *81*, 969-982 e913.

968 Trevino, A.E., Muller, F., Andersen, J., Sundaram, L., Kathiria, A., Shcherbina, A., Farh, K., Chang, H.Y.,  
969 Pasca, A.M., Kundaje, A., *et al.* (2021). Chromatin and gene-regulatory dynamics of the developing  
970 human cerebral cortex at single-cell resolution. *Cell*.

971 Tsai, A., Alves, M.R., and Crocker, J. (2019). Multi-enhancer transcriptional hubs confer phenotypic  
972 robustness. *Elife* *8*.

973 Welter, D., MacArthur, J., Morales, J., Burdett, T., Hall, P., Junkins, H., Klemm, A., Flicek, P., Manolio,  
974 T., Hindorff, L., *et al.* (2014). The NHGRI GWAS Catalog, a curated resource of SNP-trait  
975 associations. *Nucleic Acids Res* *42*, D1001-1006.

976 Yu, G., Wang, L.G., Han, Y., and He, Q.Y. (2012). clusterProfiler: an R package for comparing  
977 biological themes among gene clusters. *OMICS* *16*, 284-287.

978 Zhu, C., Yu, M., Huang, H., Juric, I., Abnousi, A., Hu, R., Lucero, J., Behrens, M.M., Hu, M., and Ren,  
979 B. (2019). An ultra high-throughput method for single-cell joint analysis of open chromatin and  
980 transcriptome. *Nat Struct Mol Biol* *26*, 1063-1070.

981 Ziffra, R.S., Kim, C.N., Ross, J.M., Wilfert, A., Turner, T.N., Haeussler, M., Casella, A.M., Przytycki, P.F.,  
982 Keough, K.C., Shin, D., *et al.* (2021). Single-cell epigenomics reveals mechanisms of human cortical  
983 development. *Nature* *598*, 205-213.

984



985 **Figure Legends**

986 **Figure 1. eNet, an algorithm to build enhancer networks based on scATAC-seq**  
987 **and scRNA-seq data.**

988 **(A)** Input: Preparation of the enhancer accessibility and gene expression matrix from  
989 scATAC-seq and scRNA-seq data. Each row represents an enhancer or a gene, while  
990 each column represents a cell.

991 **(B)** Node: Identification of putative enhancer clusters regulating a specific target gene  
992 based on the correlation between gene expression and enhancer accessibility.

993 **(C)** Edge: Determination of the predicted enhancer interactions (PEIs), the enhancer  
994 pairs with significantly high co-accessibility calculated using Cicero.

995 **(D)** Network: Construct enhancer network to represent the PEIs among enhancers in  
996 a putative enhancer cluster, where nodes represent enhancers and edges represent  
997 PEIs.

998 **(E)** Network complexity: Calculation of the network complexity by 1) network size, the  
999 number of enhancers (x-axis); and 2) network connectivity, the PEIs frequency,  
1000 quantified by the average degree of network (y-axis).

1001 **(F)** Mode: Classification of the enhancer networks into three modes based on network  
1002 complexity: Complex, Multiple and Simple, with representative examples shown in the  
1003 cartoon.

1004

1005 **Figure 2. Enhancer networks during human hematopoiesis.**

1006 **(A)** The human blood dataset.

1007 **(B)** Scatter plot of the enhancer networks during hematopoiesis, where the x-axis  
1008 represents the network size ( $\log_2$ -scaled) and the y-axis represents network  
1009 connectivity. Top 10 genes ranked by network connectivity are labelled, where known  
1010 blood-related cell identity or disease genes are red-highlighted.

1011 **(C)** Representative enhancer networks in Complex or Multiple mode.

1012 **(D)** Chromatin co-accessibility of predicted enhancer interactions (PEIs) calculated  
1013 using Cicero in Complex, Multiple and Simple modes.  $p$ -values were calculated using

1014 the Student's *t*-test. \* $p < 0.05$ ; \*\* $p < 0.01$ ; \*\*\* $p < 0.001$ ; *n.s.*, not significant.  
1015 **(E and F)** Enrichment of cell identity **(E)** and disease genes **(F)** in genes in Complex,  
1016 Multiple and Simple modes, using the whole genome as the background. The number  
1017 of cell identity or disease genes and total genes in each group are labelled on each  
1018 bar. *p*-values were calculated using the binomial test. \* $p < 0.05$ ; \*\* $p < 0.01$ ; \*\*\* $p < 0.001$ ;  
1019 *n.s.*, not significant.  
1020 **(G and H)** Enrichment of cell identity **(G)** and disease genes **(H)** (y-axis) is plotted for  
1021 top genes (x-axis) ranked by different properties of enhancer networks, including  
1022 network connectivity (the frequency of PEIs in this study), network size (equivalent to  
1023 the enhancer number in multiple enhancers (Osterwalder et al., 2018), DORCs (Ma et  
1024 al., 2020)), or overall chromatin accessibility of enhancers (similar to the sum of the  
1025 individual constituent enhancers in super-enhancers (Hnisz et al., 2013)).  
1026 **(I)** Enrichment of the diseases/traits-related SNPs curated in the GWAS catalog for  
1027 enhancers in Complex (hub and non-hub), Multiple, and Simple modes, using  
1028 randomly selected genomic regions as the control. *p*-values were calculated using the  
1029 binomial test. \* $p < 0.05$ ; \*\* $p < 0.01$ ; \*\*\* $p < 0.001$ ; *n.s.*, not significant.  
1030 **(J)** Enrichment of blood related GWAS SNPs.

1031

1032 **Figure 3. Enhancer network outperforms super-enhancer in predicting cell**  
1033 **identity and disease genes.**

1034 **(A)** Venn diagram showing the overlap between genes in Complex mode in **Figure 2**  
1035 in blood dataset and hematopoiesis-related SEs, resulting in three groups, Complex-  
1036 only, Complex SE (SEs with network structure) and SE-only (SEs without network  
1037 structure)  
1038 **(B, C)** Co-accessibility **(B)** and chromatin accessibility **(C)** of the constituent enhancers  
1039 in three groups, using regular enhancers as control. *p*-values were calculated using  
1040 Student's *t*-test. \* $p < 0.05$ ; \*\* $p < 0.01$ ; \*\*\* $p < 0.001$ ; *n.s.*, not significant.  
1041 **(D and E)** Enrichment of cell identity **(D)** and disease genes **(E)** in genes in three  
1042 groups, using the whole genome as the background. *p*-values were calculated using

1043 the binomial test.  $*p < 0.05$ ;  $**p < 0.01$ ;  $***p < 0.001$ ; *n.s.*, not significant.

1044 **(F and G)** Enrichment of cell identity **(F)** and disease genes **(G)** (y-axis) for the genes  
1045 in **(A)**, ranked by the network complexity (x-axis), measured by **1)** network connectivity,  
1046 as well as the overall enhancer activity, **2)** network size as well as enhancer number,  
1047 **3)** chromatin accessibility and **4)** SE ranks based on H3K27ac signals calculated by  
1048 ROSE (Hnisz et al., 2013).

1049

1050 **Figure 4. Comparison of enhancer networks based on PEIs and Hi-C chromatin**  
1051 **interactions in GM12878 cell line.**

1052 **(A)** Enrichment of chromatin interactions detected by Hi-C in three groups of enhancer  
1053 pairs ranked by chromatin co-accessibility: High (PEIs), Middle and Low, using the  
1054 group Low as the background. p-values were calculated using binomial test.  $*p < 0.05$ ;  
1055  $**p < 0.01$ ;  $***p < 0.001$ ; *n.s.*, not significant.

1056 **(B)** Cicero connections for the *CCR7* locus compared to Hi-C (Rao et al., 2014). Link  
1057 heights for Hi-C are the interaction frequency of each chromatin interaction.

1058 **(C)** *CCR7* enhancer networks built based on PEIs (above) or Hi-C chromatin  
1059 interactions (bottom).

1060 **(D)** Venn diagram showing the overlap of genes regulated by the Complex enhancer  
1061 networks defined based on PEIs and Hi-C data, resulting in three groups: PEIs-with-  
1062 HiC, PEIs-only, and HiC-only.

1063 **(E and F)** Enrichment of cell identity **(E)** and disease genes **(F)** in three groups, using  
1064 the whole genome as the background. p-values were calculated using the binomial  
1065 test.  $*p < 0.05$ ;  $**p < 0.01$ ;  $***p < 0.001$ ; *n.s.*, not significant.

1066

1067 **Figure 5. Dynamics of enhancer networks during B cell differentiation.**

1068 **(A)** UMAP of B cell differentiation colored by cell type annotation, the dash-line  
1069 indicates the pseudotime during B cell differentiation inferred based on scATAC-seq  
1070 data.

1071 **(B)** Genome browser track of *PAX5* putative enhancer cluster ( $n=24$ ) that are  
1072 accessible at any one of the developmental stages of HSC, LMPP, CLP, pre-B, and B

1073 cell types.

1074 **(C)** Violin plot showing *PAX5* expression.

1075 **(D)** The *PAX5* enhancer networks in HSC, LMPP, CLP, pre-B, and B cells, where the  
1076 colored nodes represent accessible enhancers while the empty nodes represent  
1077 closed enhancers. The edges represent PEIs.

1078

1079 **Figure 6. Enhancer networks in various human or mouse tissues across**  
1080 **different single-cell platforms.**

1081 **(A, C, E, G)** Enrichment of cell identity genes (y-axis) is plotted for top genes ranked  
1082 by various scoring methods (x-axis) in different tissues and approaches. **(A)** mouse  
1083 skin dataset (SHARE-seq) (Ma et al., 2020), **(C)** mouse cerebral cortex dataset  
1084 (SNARE-seq) (Chen et al., 2019), **(E)** human fetal kidney dataset (sci-ATAC-seq3)  
1085 (Domcke et al., 2020), and **(G)** human fetal heart dataset (sci-ATAC-seq3) (Domcke et  
1086 al., 2020).

1087 **(B, D, F, H)** Enrichment of tissue-related diseases/traits SNPs curated in GWAS  
1088 catalog in enhancers in Complex (hub and non-hub), Multiple, and Simple modes,  
1089 using randomly selected genomic regions as the control. **(B)** mouse skin dataset, **(D)**  
1090 mouse cerebral cortex dataset, **(F)** human fetal kidney dataset, and **(H)** human fetal  
1091 heart dataset. *p*-values were calculated using the binomial test. \**p* < 0.05; \*\**p* < 0.01;  
1092 \*\*\**p* < 0.001; *n.s.*, not significant.

1093

1094 **Figure 7: Model of enhancer networks in gene regulation.**

1095 **(A)** Functional enrichment of genes regulated by enhancer networks in Simple,  
1096 Multiple, and Complex modes in human blood, mouse skin, and mouse cerebral cortex  
1097 datasets.

1098 **(B)** Three modes of enhancer networks. Simple mode, involving one or very few  
1099 enhancers, provides quick response to control a large amount of regular genes, such  
1100 as housekeeping genes, at low cost; Multiple mode, involving multiple enhancers but  
1101 limited PEIs, increases regulation strength as well as redundancy at the cost of the

1102 number of enhancers (nodes); Complex mode, involving multiple enhancers and  
1103 frequent PEIs, provides robustness of gene regulation for key genes, such as cell  
1104 identity and disease genes, at the cost of edges, where hub enhancers are functionally  
1105 important.  
1106

1107 **Supplemental Figures and Legends**

1108 **Figure S1. Enhancer networks during human hematopoiesis, related to Figure 2.**

1109 **(A)** Distribution of network size for the enhancer networks during human  
1110 hematopoiesis, where the dash line indicates the median of network size.

1111 **(B and C)** The co-accessibility **(B)** and chromatin accessibility **(C)** of the constituent  
1112 enhancers in the example of **Fig 2C**. *p*-values were calculated using Student's *t*-test.

1113 **(D)** PhastCons conservation score of enhancers in Complex (hub and non-hub),  
1114 Multiple and Simple groups.

1115 **(E)** Scatter plot of the weighted enhancer networks during hematopoiesis, where the  
1116 x-axis represents the network size (log<sub>2</sub>-scaled) and the y-axis represents network  
1117 connectivity. Top 10 genes ranked by network connectivity were labelled, where known  
1118 blood-related cell identity or disease genes were red-highlighted.

1119 **(F and G)** Enrichment of cell identity **(F)** and disease genes **(G)** (y-axis) is plotted for  
1120 top genes (x-axis) ranked by different properties of the weighted enhancer networks in  
1121 **(E)**, including network connectivity (the frequency of PEIs in this study), network size  
1122 (equivalent to the enhancer number in multiple enhancers, or overall chromatin  
1123 accessibility of enhancers).

1124

1125 **Figure S2. Classification of the enhancer networks using various threshold**  
1126 **values of network connectivity and network size in human blood dataset,**  
1127 **related to Figure 2.**

1128 **(A and B)** Various threshold values of network connectivity **(A)** and network size **(B)**.  
1129 Enrichment of cell identity (left) and disease genes (middle) in genes in Complex,  
1130 Multiple, and Simple modes, using the whole genome as the background. Enrichment  
1131 of the diseases/traits-related SNPs curated in the GWAS catalog (right) in enhancers  
1132 in Complex (hub and non-hub), Multiple, and Simple modes, using randomly selected  
1133 genomic regions as the control. *p*-values were calculated using the binomial test. \**p* <  
1134 0.05; \*\**p* < 0.01; \*\*\**p* < 0.001; *n.s.*, not significant.

1135

1136 **Figure S3. The relationship of the network connectivity and network size,**

1137 **related to Figure 2.**

1138 **(A and B)** The network size **(A)** and network connectivity **(B)** in genes regulated by  
1139 Complex and Multiple enhancer networks with a similar network size level. *p*-values  
1140 were calculated using Student's *t*-test. \**p* < 0.05; \*\**p* < 0.01; \*\*\**p* < 0.001; *n.s.*, not  
1141 significant.

1142 **(C and D)** Enrichment of blood-related cell identity genes **(C)** and disease genes **(D)**  
1143 in genes regulated by Complex and Multiple enhancer networks with a similar network  
1144 size level, using whole genome as the background. *p*-values were calculated using the  
1145 binomial test. \**p* < 0.05; \*\**p* < 0.01; \*\*\**p* < 0.001; *n.s.*, not significant.

1146

1147 **Figure S4. The relationship of the network connectivity and chromatin**  
1148 **accessibility, related to Figure 2.**

1149 **(A and B)** The chromatin accessibility **(A)** and network connectivity **(B)** in genes  
1150 regulated by Complex and Multiple enhancer networks with a similar chromatin  
1151 accessibility level. *p*-values were calculated using Student's *t*-test. \**p* < 0.05; \*\**p* < 0.01;  
1152 \*\*\**p* < 0.001; *n.s.*, not significant.

1153 **(C and D)** Enrichment of blood-related cell identity genes **(C)** and disease genes **(D)**  
1154 in genes regulated by Complex and Multiple enhancer networks with a similar  
1155 chromatin accessibility level, using whole genome as the background. *p*-values were  
1156 calculated using the binomial test. \**p* < 0.05; \*\**p* < 0.01; \*\*\**p* < 0.001; *n.s.*, not  
1157 significant.

1158

1159 **Figure S5. The SEs and Hi-C in GM12878 cell line and dynamic of enhancer**  
1160 **networks during B cell differentiation, related to Figure 3-5.**

1161 **(A)** Venn diagram showing the overlap of genes regulated by enhancer networks in  
1162 Complex mode and SEs in GM12878 dataset, resulting in three groups: Complex SE,  
1163 Complex-only, and SE-only.

1164 **(B and C)** Enrichment of cell identity **(B)** and disease genes **(C)** in genes in three  
1165 groups, using the whole genome as the background. *p*-values were calculated using

1166 the binomial test.  $*p < 0.05$ ;  $**p < 0.01$ ;  $***p < 0.001$ ; *n.s.*, not significant.  
1167 **(D)** Venn diagram showing the overlap between the network hub enhancers based on  
1168 PEI and Hi-C data in the enhancer networks in PEI-with-HiC group in **Figure 4D**.  
1169 **(E and F)** Enrichment of all GWAS SNPs **(E)** and B cell-related GWAS SNPs **(F)** in  
1170 three groups of hub enhancers: PEI-only, Hi-C-only and PEI-with-Hi-C. *p*-values were  
1171 calculated using the binomial test.  $*p < 0.05$ ;  $**p < 0.01$ ;  $***p < 0.001$ ; *n.s.*, not  
1172 significant.  
1173 **(G)** The pseudotime during B cell differentiation inferred based on scATAC-seq data.  
1174 **(H)** Dynamics of gene expression (left), chromatin accessibility (middle), and enhancer  
1175 network connectivity (right) across the B cell differentiation pseudotime (column).  
1176 Genes highly expressed in pre-B or B cells and controlled by enhancer networks in the  
1177 Complex mode are included (row), where some known cell identity genes are labelled.  
1178 **(I)** Difference of the pseudotime of B cell differentiation between onset of gene  
1179 expression and establishment of enhancer networks. *p*-values were calculated using  
1180 one-sided paired Student's *t*-test.  $*p < 0.05$ ;  $**p < 0.01$ ;  $***p < 0.001$ ; *n.s.*, not significant.  
1181

1182 **Figure S6. eNet analysis in various human or mouse tissues across different**  
1183 **single-cell platforms, related to Figure 6.**

1184 **(A, C, E, G)** Enrichment of cell identity (left) and disease genes (right) in genes in  
1185 Complex, Multiple and Simple modes, using the whole genome as the background. **(A)**  
1186 mouse skin dataset (SHARE-seq) (Ma et al., 2020), **(C)** mouse cerebral cortex dataset  
1187 (SNARE-seq) (Chen et al., 2019), **(E)** human fetal kidney dataset (sci-ATAC-seq3)  
1188 (Domcke et al., 2020), and **(G)** human fetal heart dataset (sci-ATAC-seq3) (Domcke et  
1189 al., 2020). The number of cell identity or disease genes and total genes in each group  
1190 are labelled on each bar. *p*-values were calculated using the binomial test.  $*p < 0.05$ ;  
1191  $**p < 0.01$ ;  $***p < 0.001$ ; *n.s.*, not significant.

1192 **(B, D, F, H)** Enrichment of disease genes (y-axis) is plotted for top genes ranked by  
1193 various scoring methods (x-axis) in different tissues and approaches. **(B)** mouse skin  
1194 dataset, **(D)** mouse cerebral cortex dataset, **(F)** human fetal kidney dataset, and **(H)**



1195 human fetal heart dataset.

1196

1197 **Figure S7. Three modes of enhancer networks in gene regulation, related to**

1198 **Figure 7.**

1199 **(A)** Percentage of transcription factors (TFs) in genes regulated by enhancer networks  
1200 in the Simple, Multiple and Complex modes.  $p$ -values were calculated using the  
1201 binomial-test.  $*p < 0.05$ ;  $**p < 0.01$ ;  $***p < 0.001$ ; *n.s.*, not significant.

1202 **(B and C)** Enrichment of cell identity **(B)** and disease genes **(C)** ranked by two network  
1203 connectivity metrics: enhancer network connectivity (average) and network  
1204 connectivity (maximum) in the human blood, mouse skin, and mouse cerebral cortex  
1205 datasets.

1206

1207 **Supplementary Tables**

1208 **Table S1**

1209 A list of all used datasets and accession numbers, related to Figure 2-6.

1210 **Table S2**

1211 List of enhancer networks in human blood, mouse skin, cerebral cortex, human fetal  
1212 kidney and heart datasets, related to Figure 2-6.

1213 **Table S3**

1214 The list of cell identity and disease genes for human blood, mouse skin, cerebral  
1215 cortex, human fetal kidney and heart datasets, related to Figure 2-6.

1216 **Table S4**

1217 The list of blood-related SEs catalog, related to Figure 3 and 4.

1218

**Figure 1. eNet, an algorithm to build enhancer networks based on scATAC-seq and scRNA-seq data.**

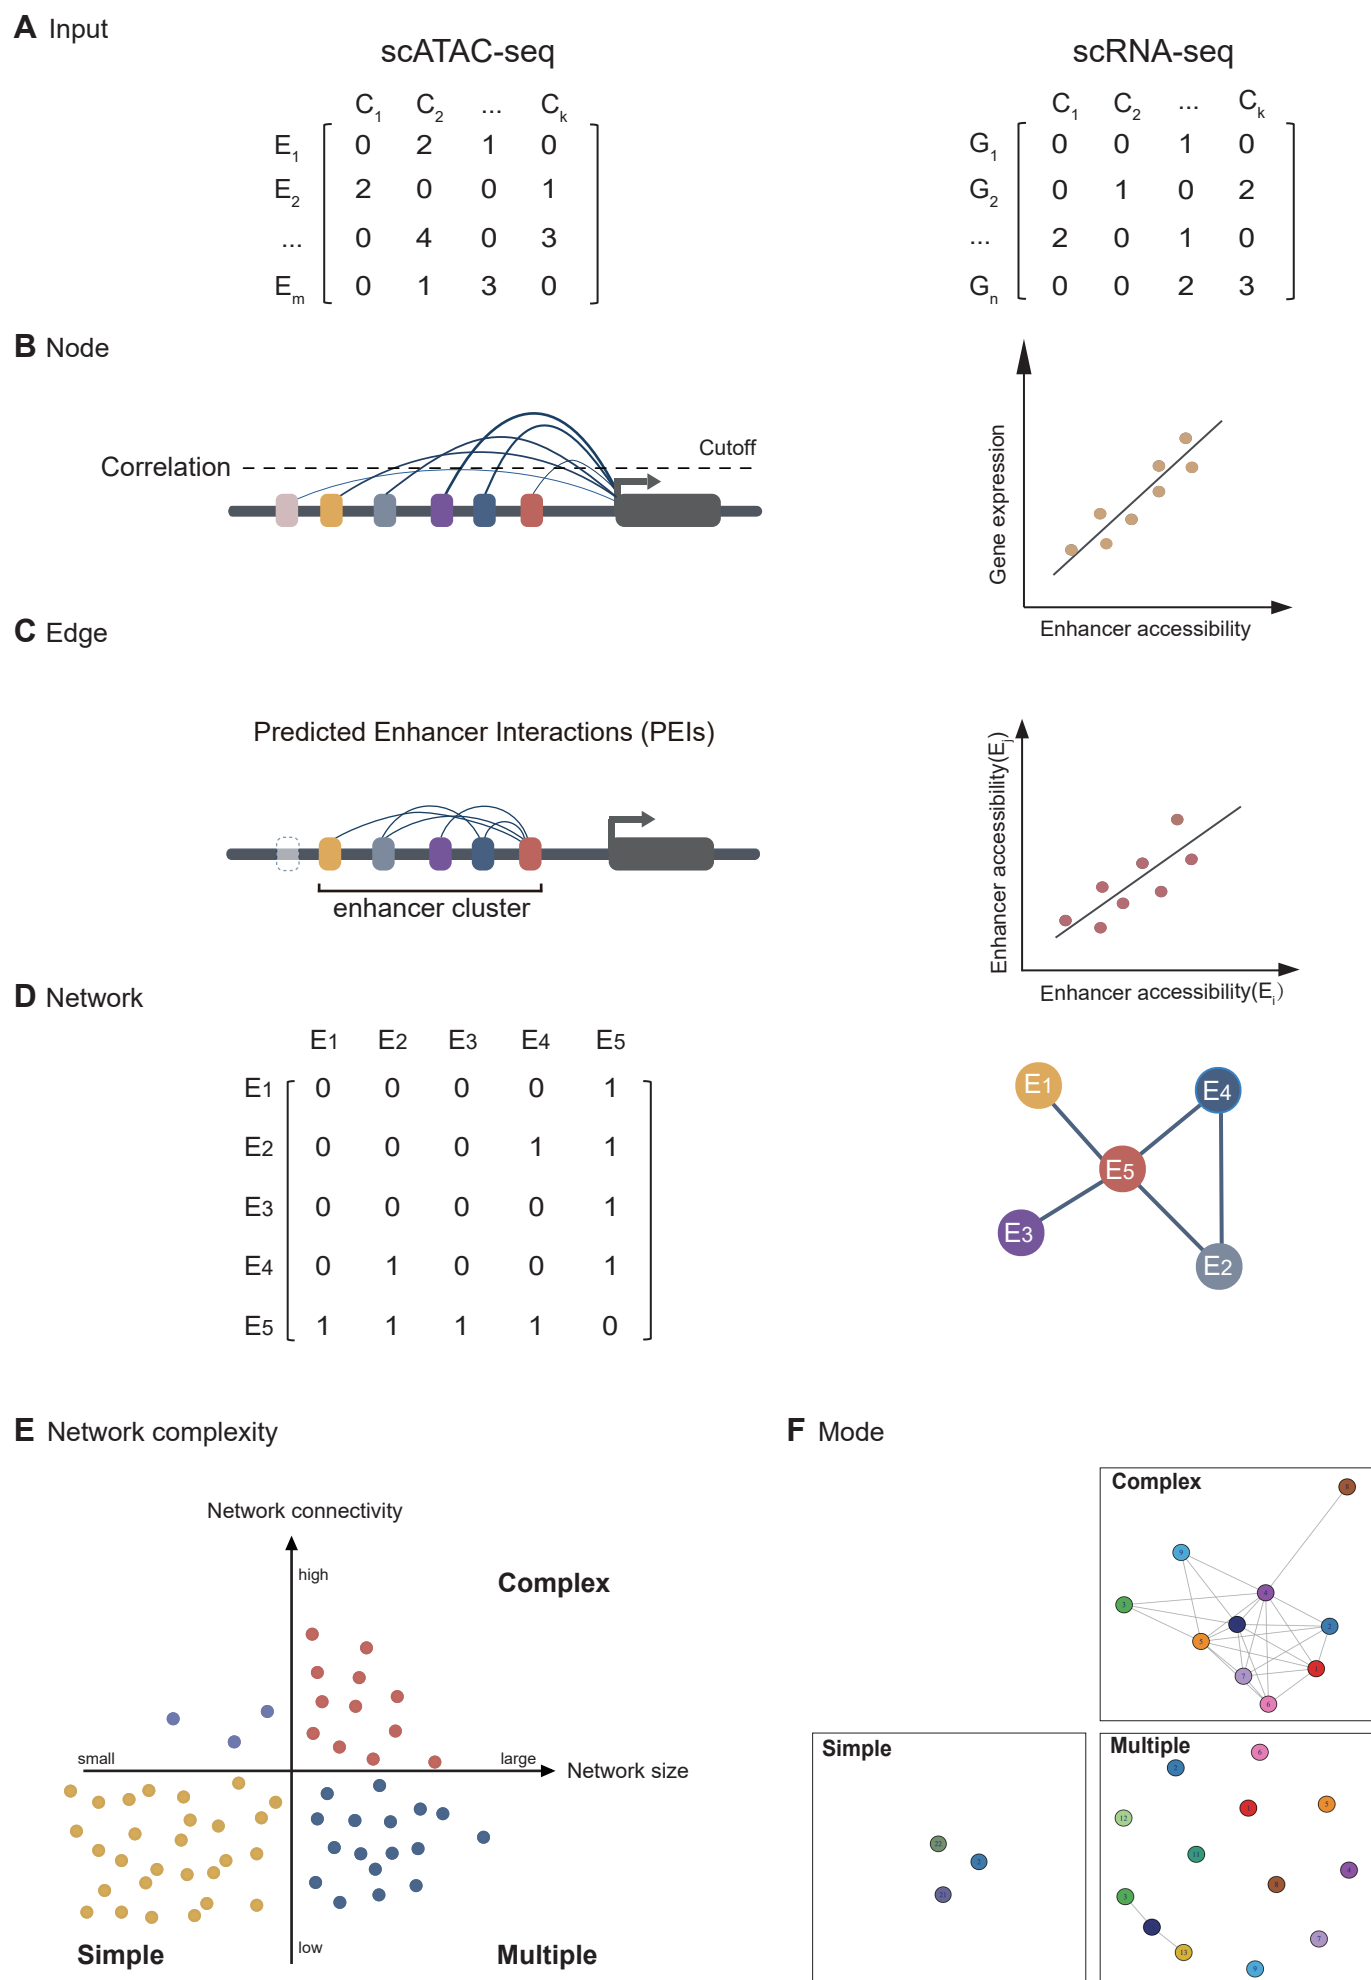

## Figure 2. Enhancer networks during human hematopoiesis

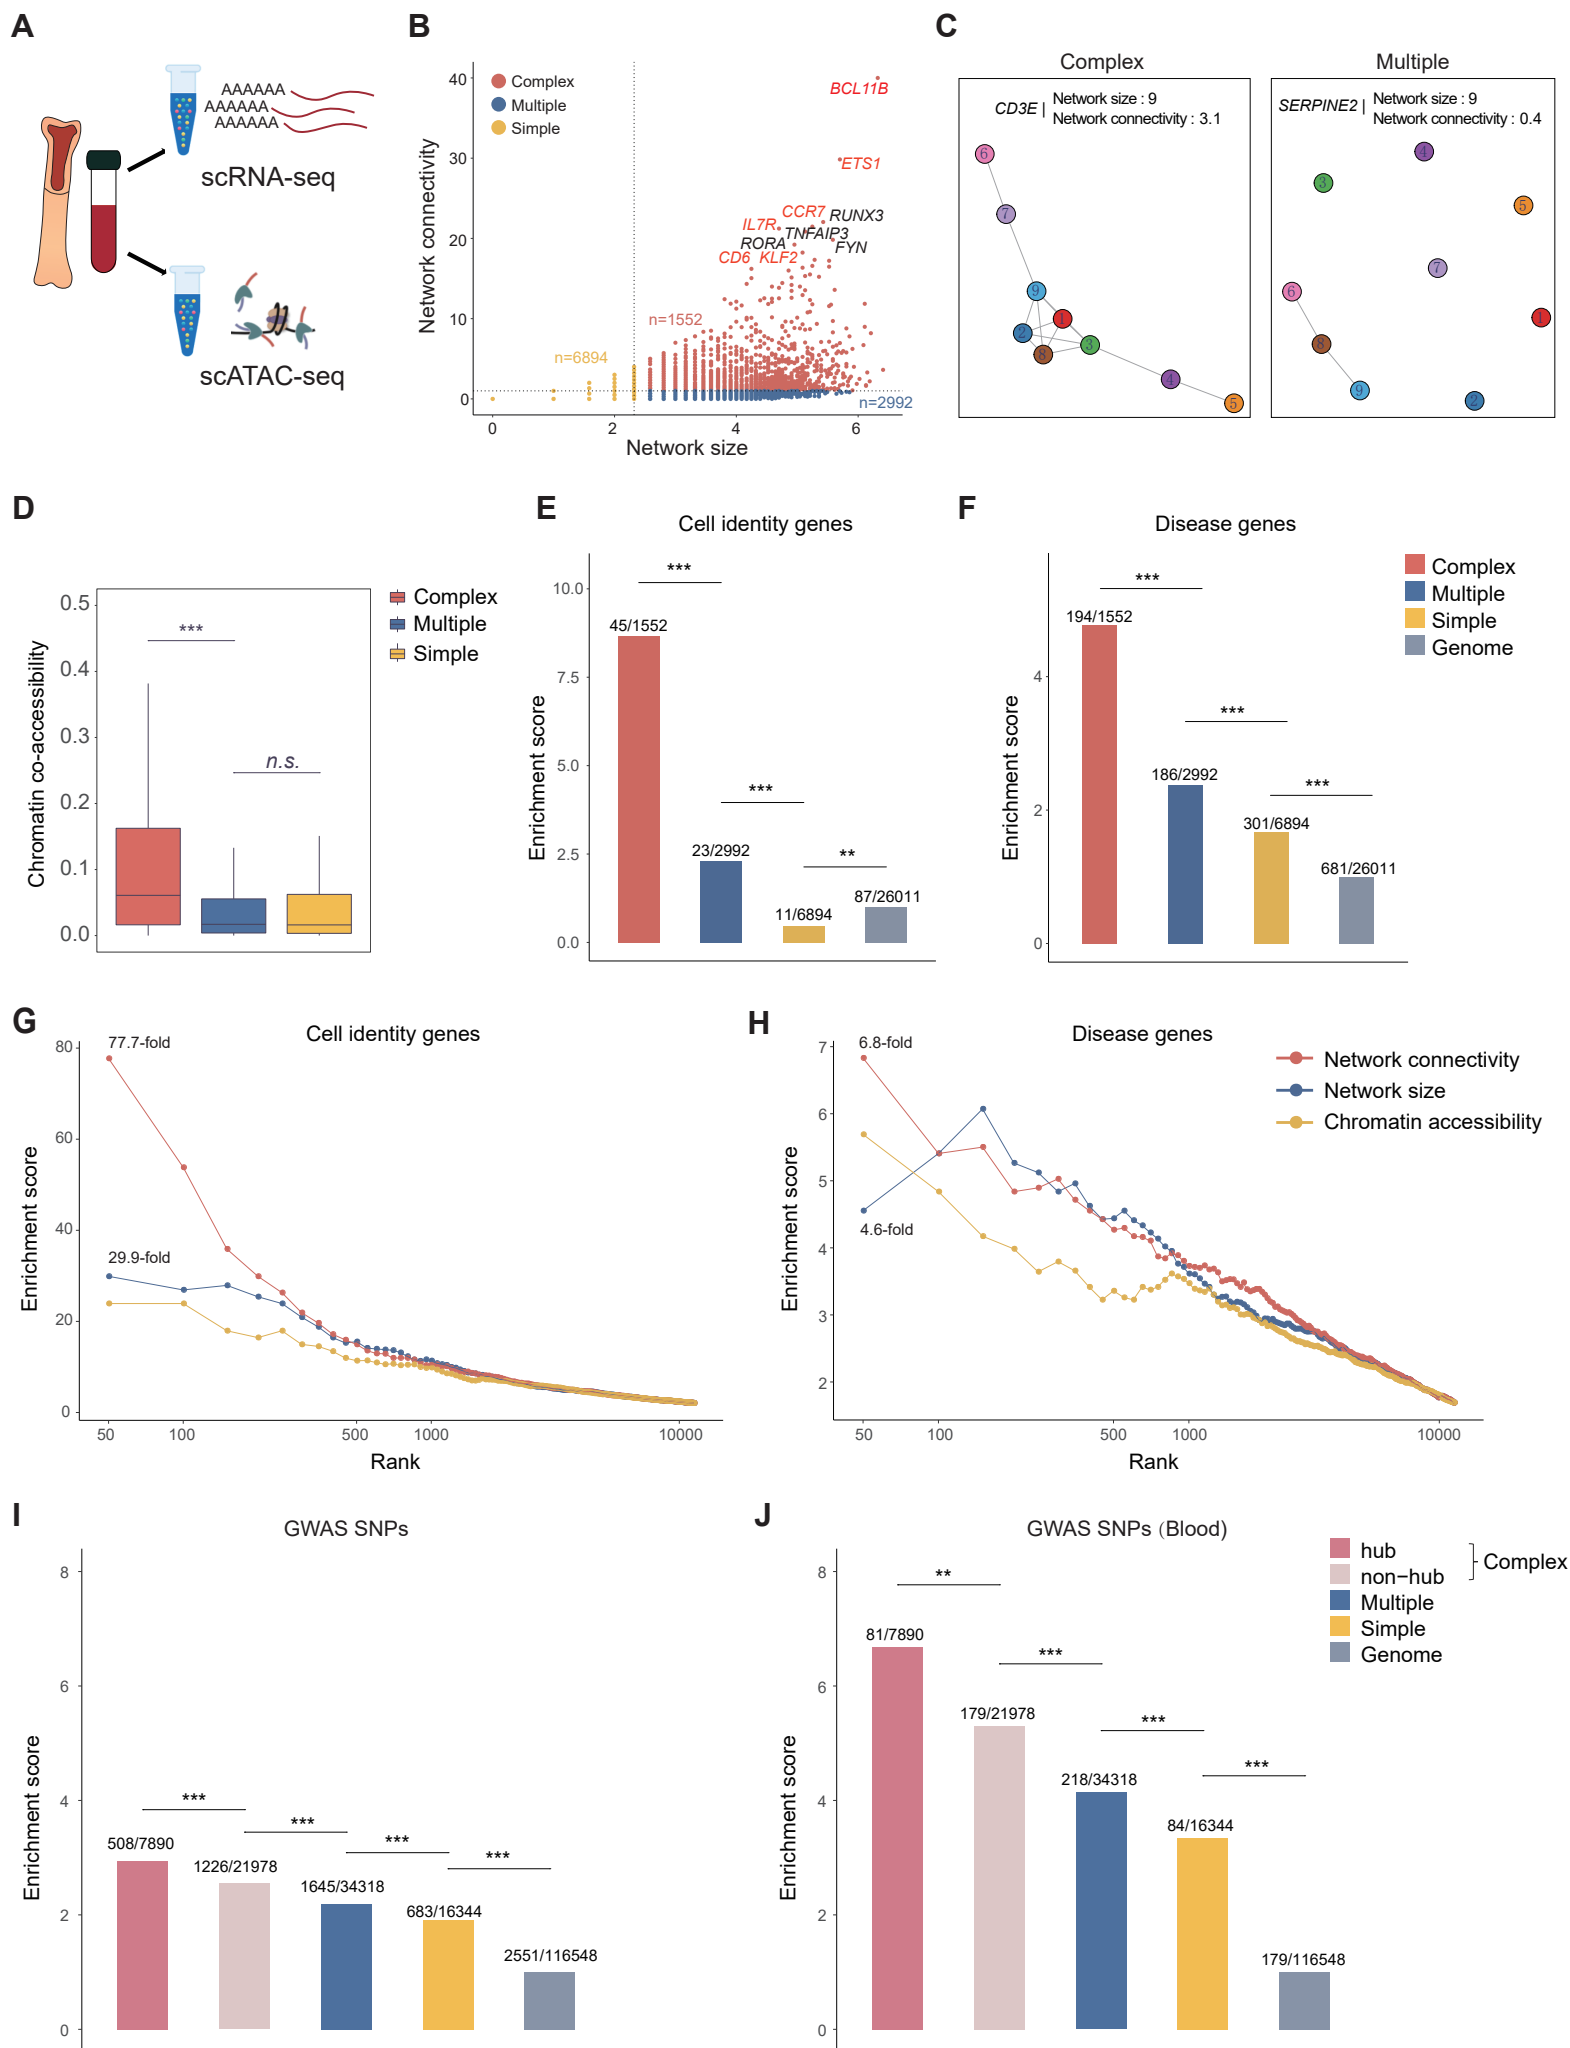

**Figure 3. Enhancer network outperforms super-enhancer in predicting cell identity and disease genes.**

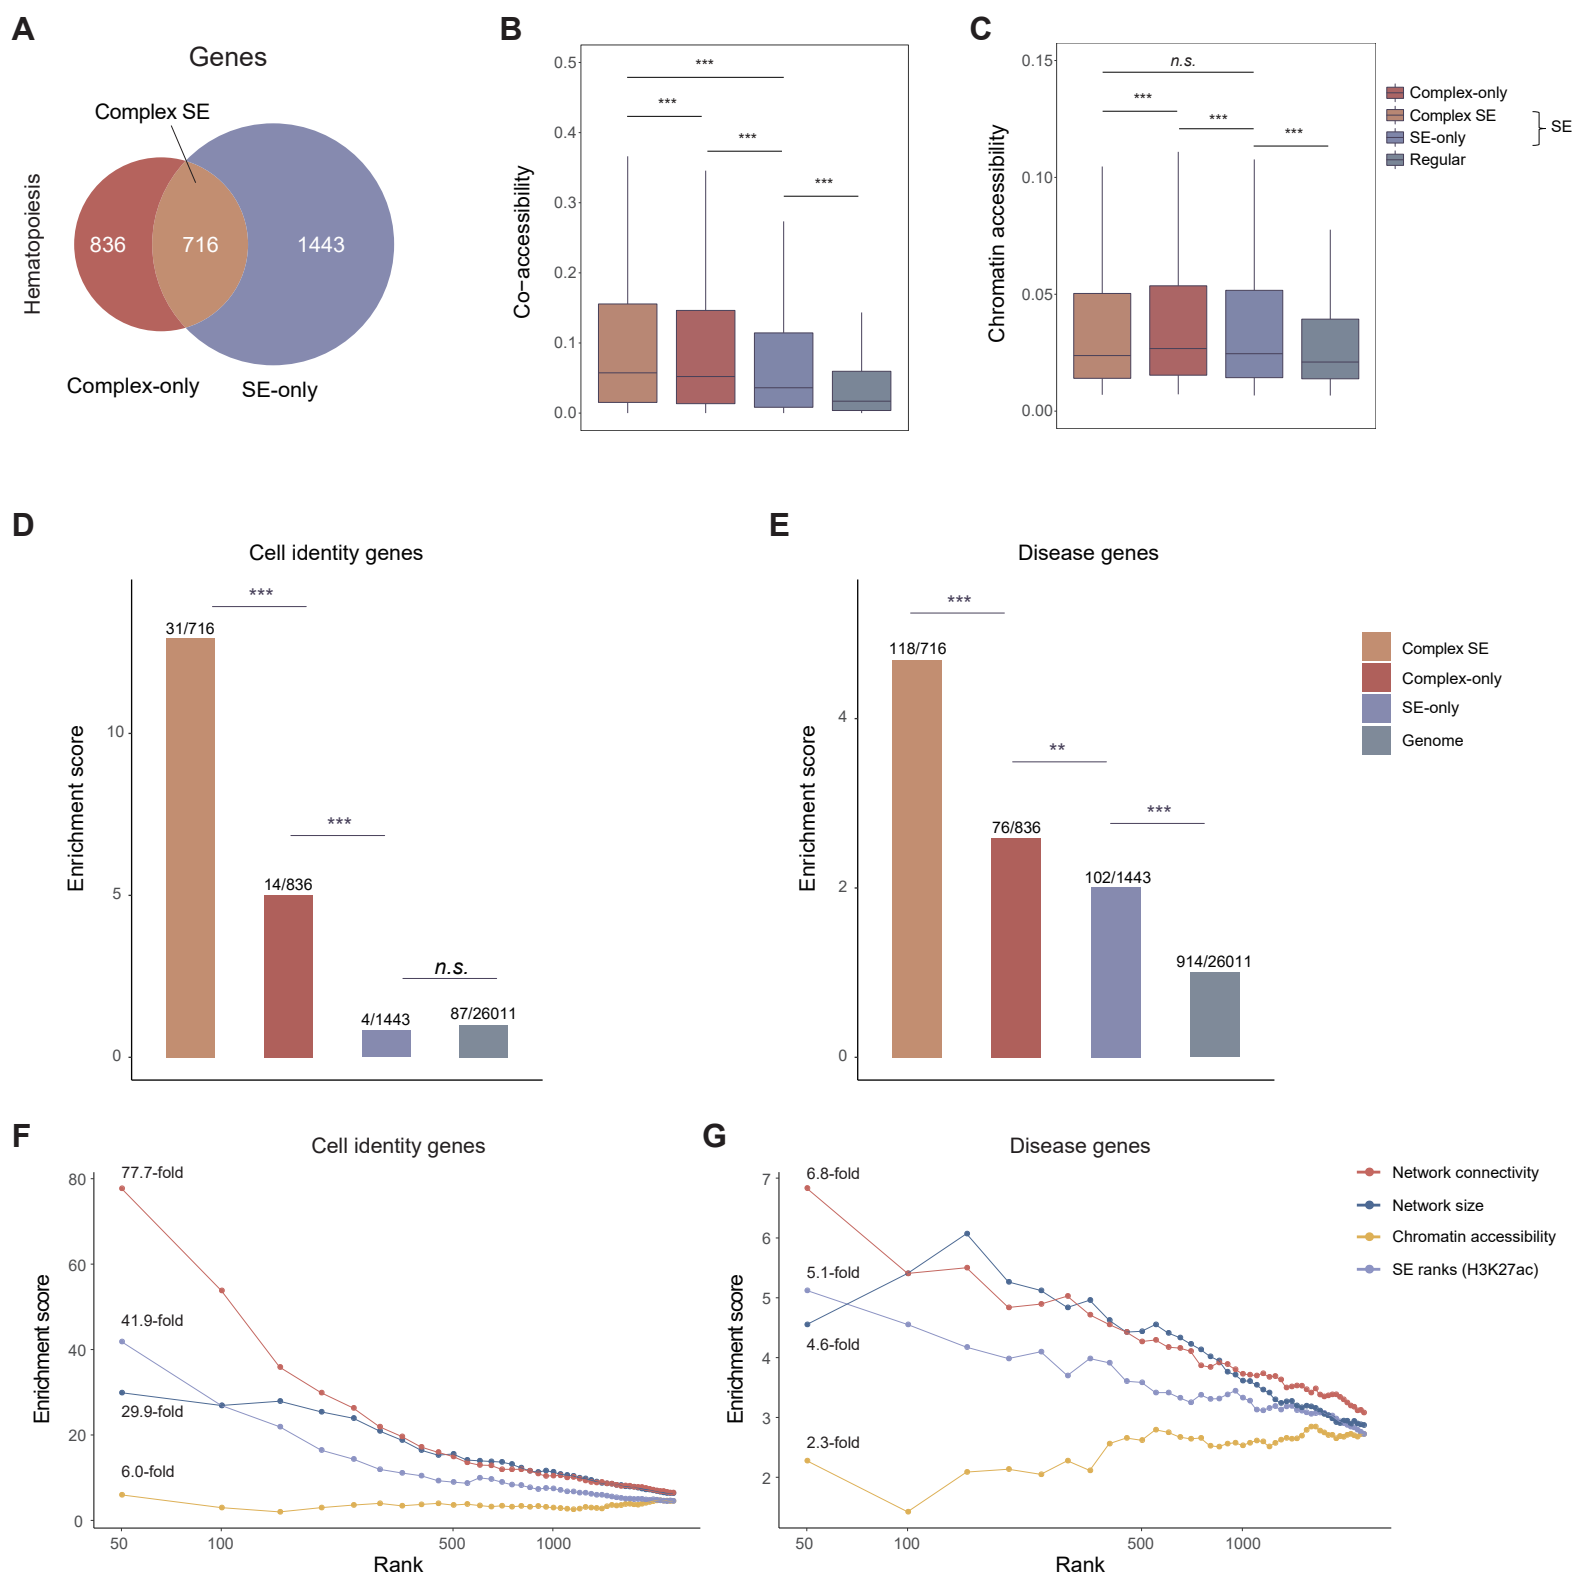

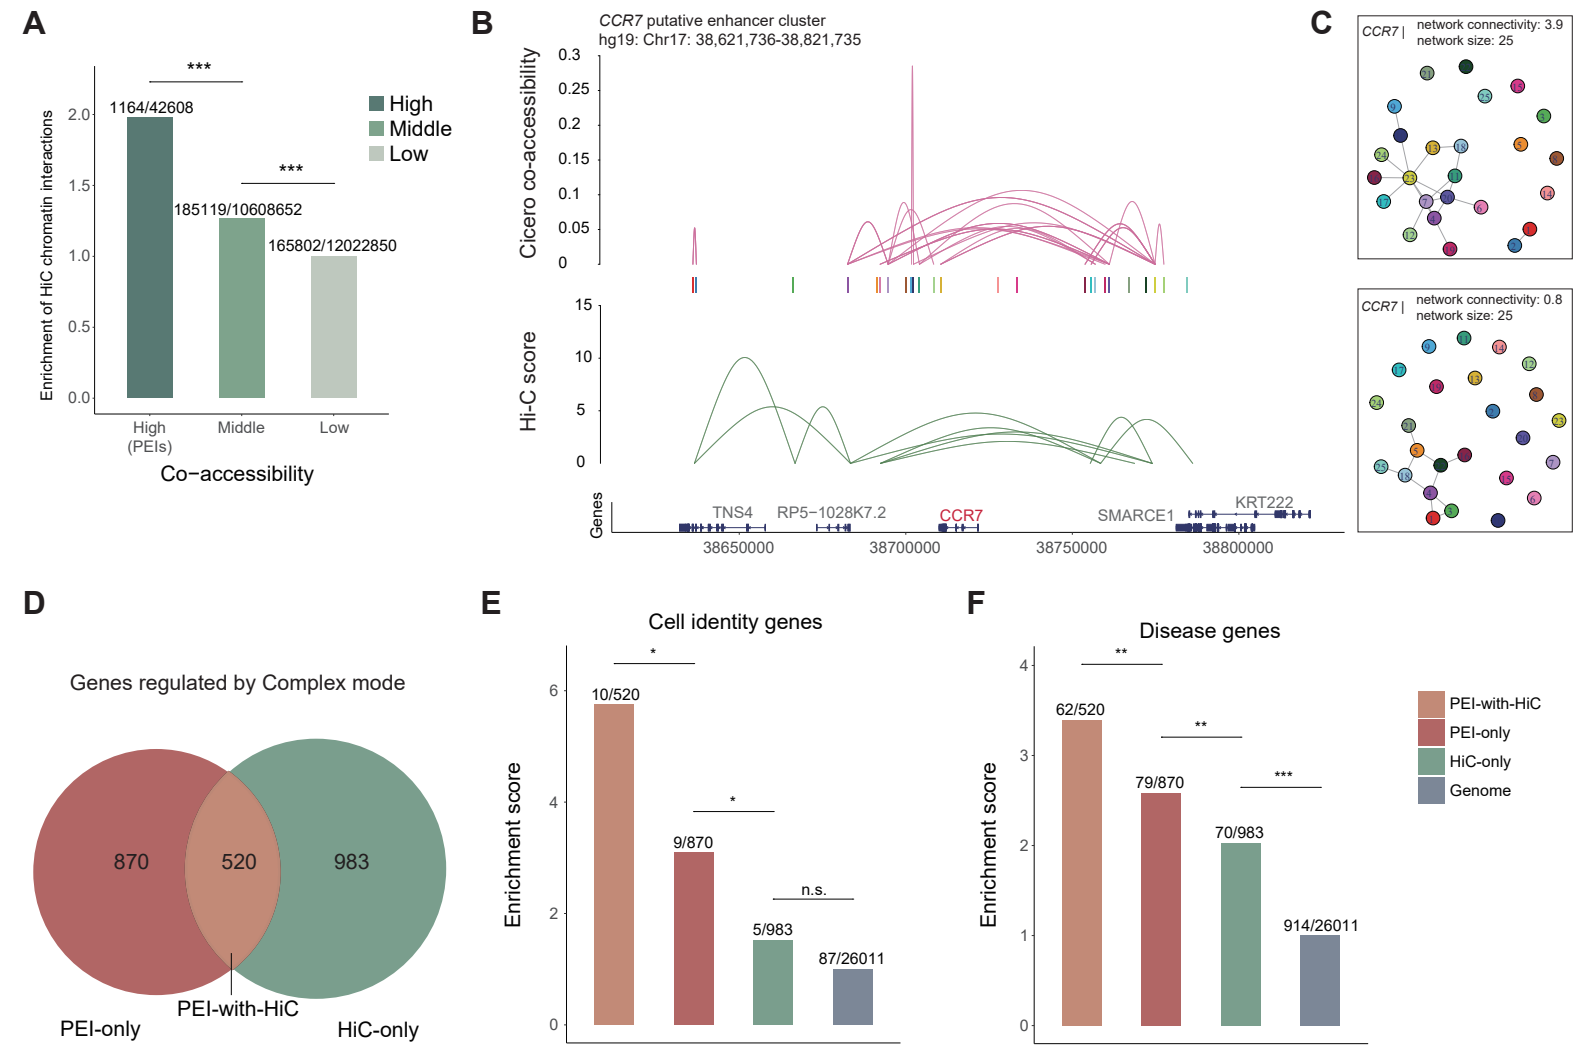

### Figure 5. Dynamics of PAX5 enhancer network during B cell differentiation.

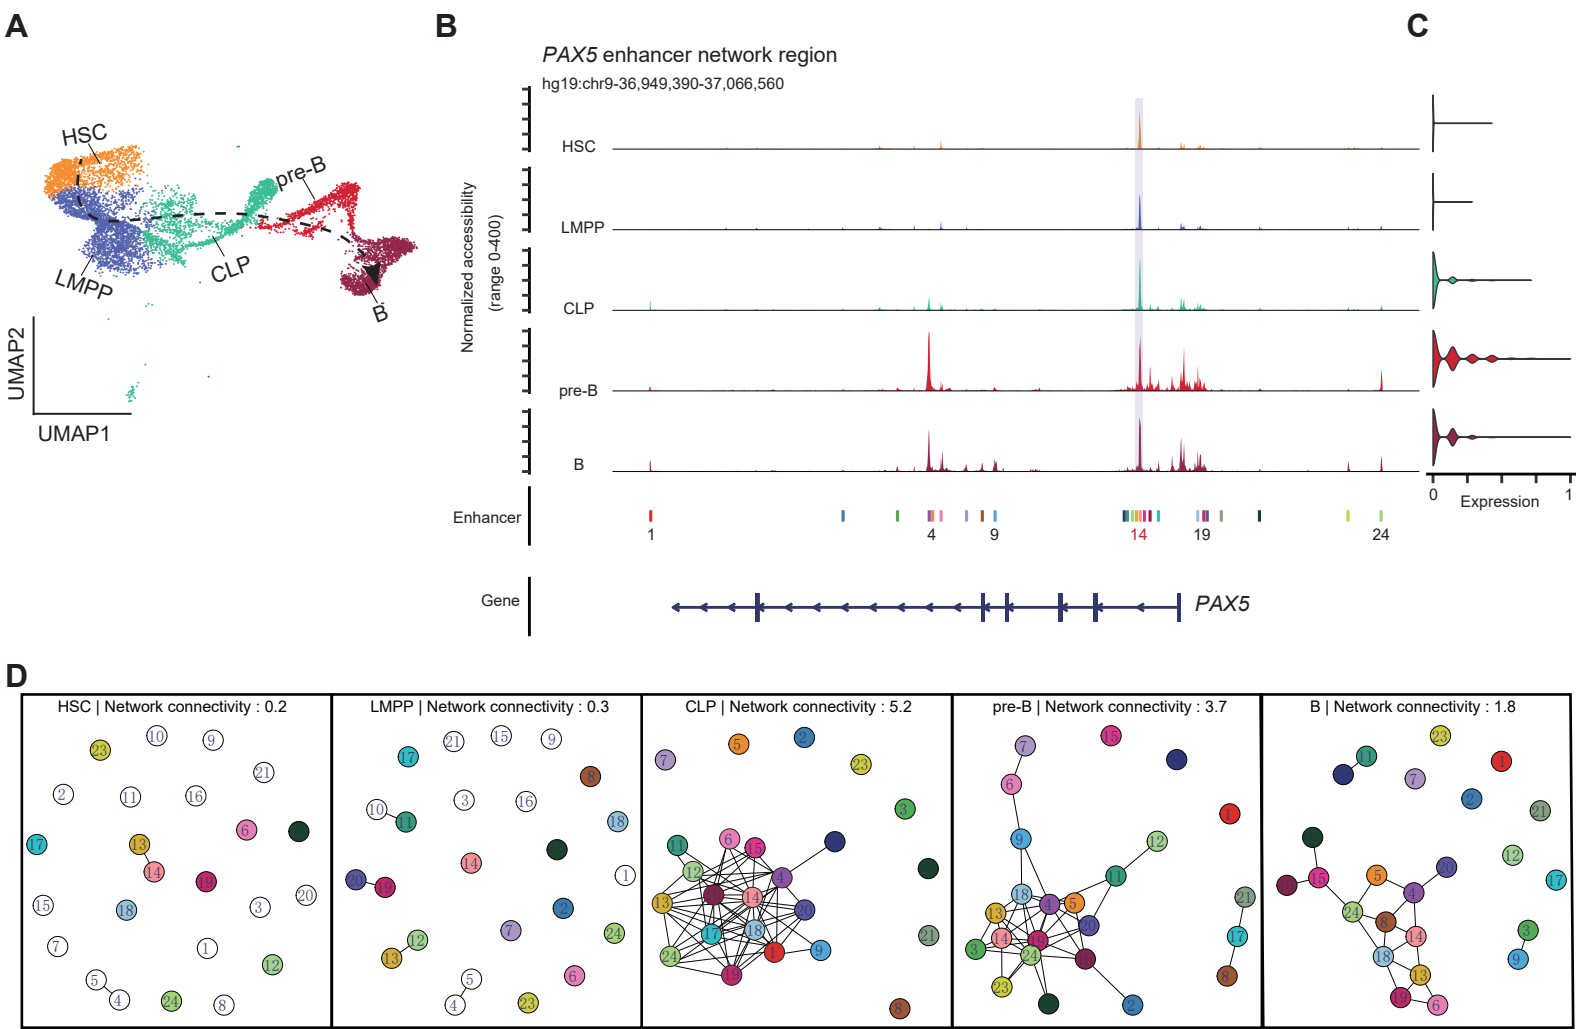

**Figure 6. Enhancer networks in various human or mouse tissues across different single-cell platforms.**

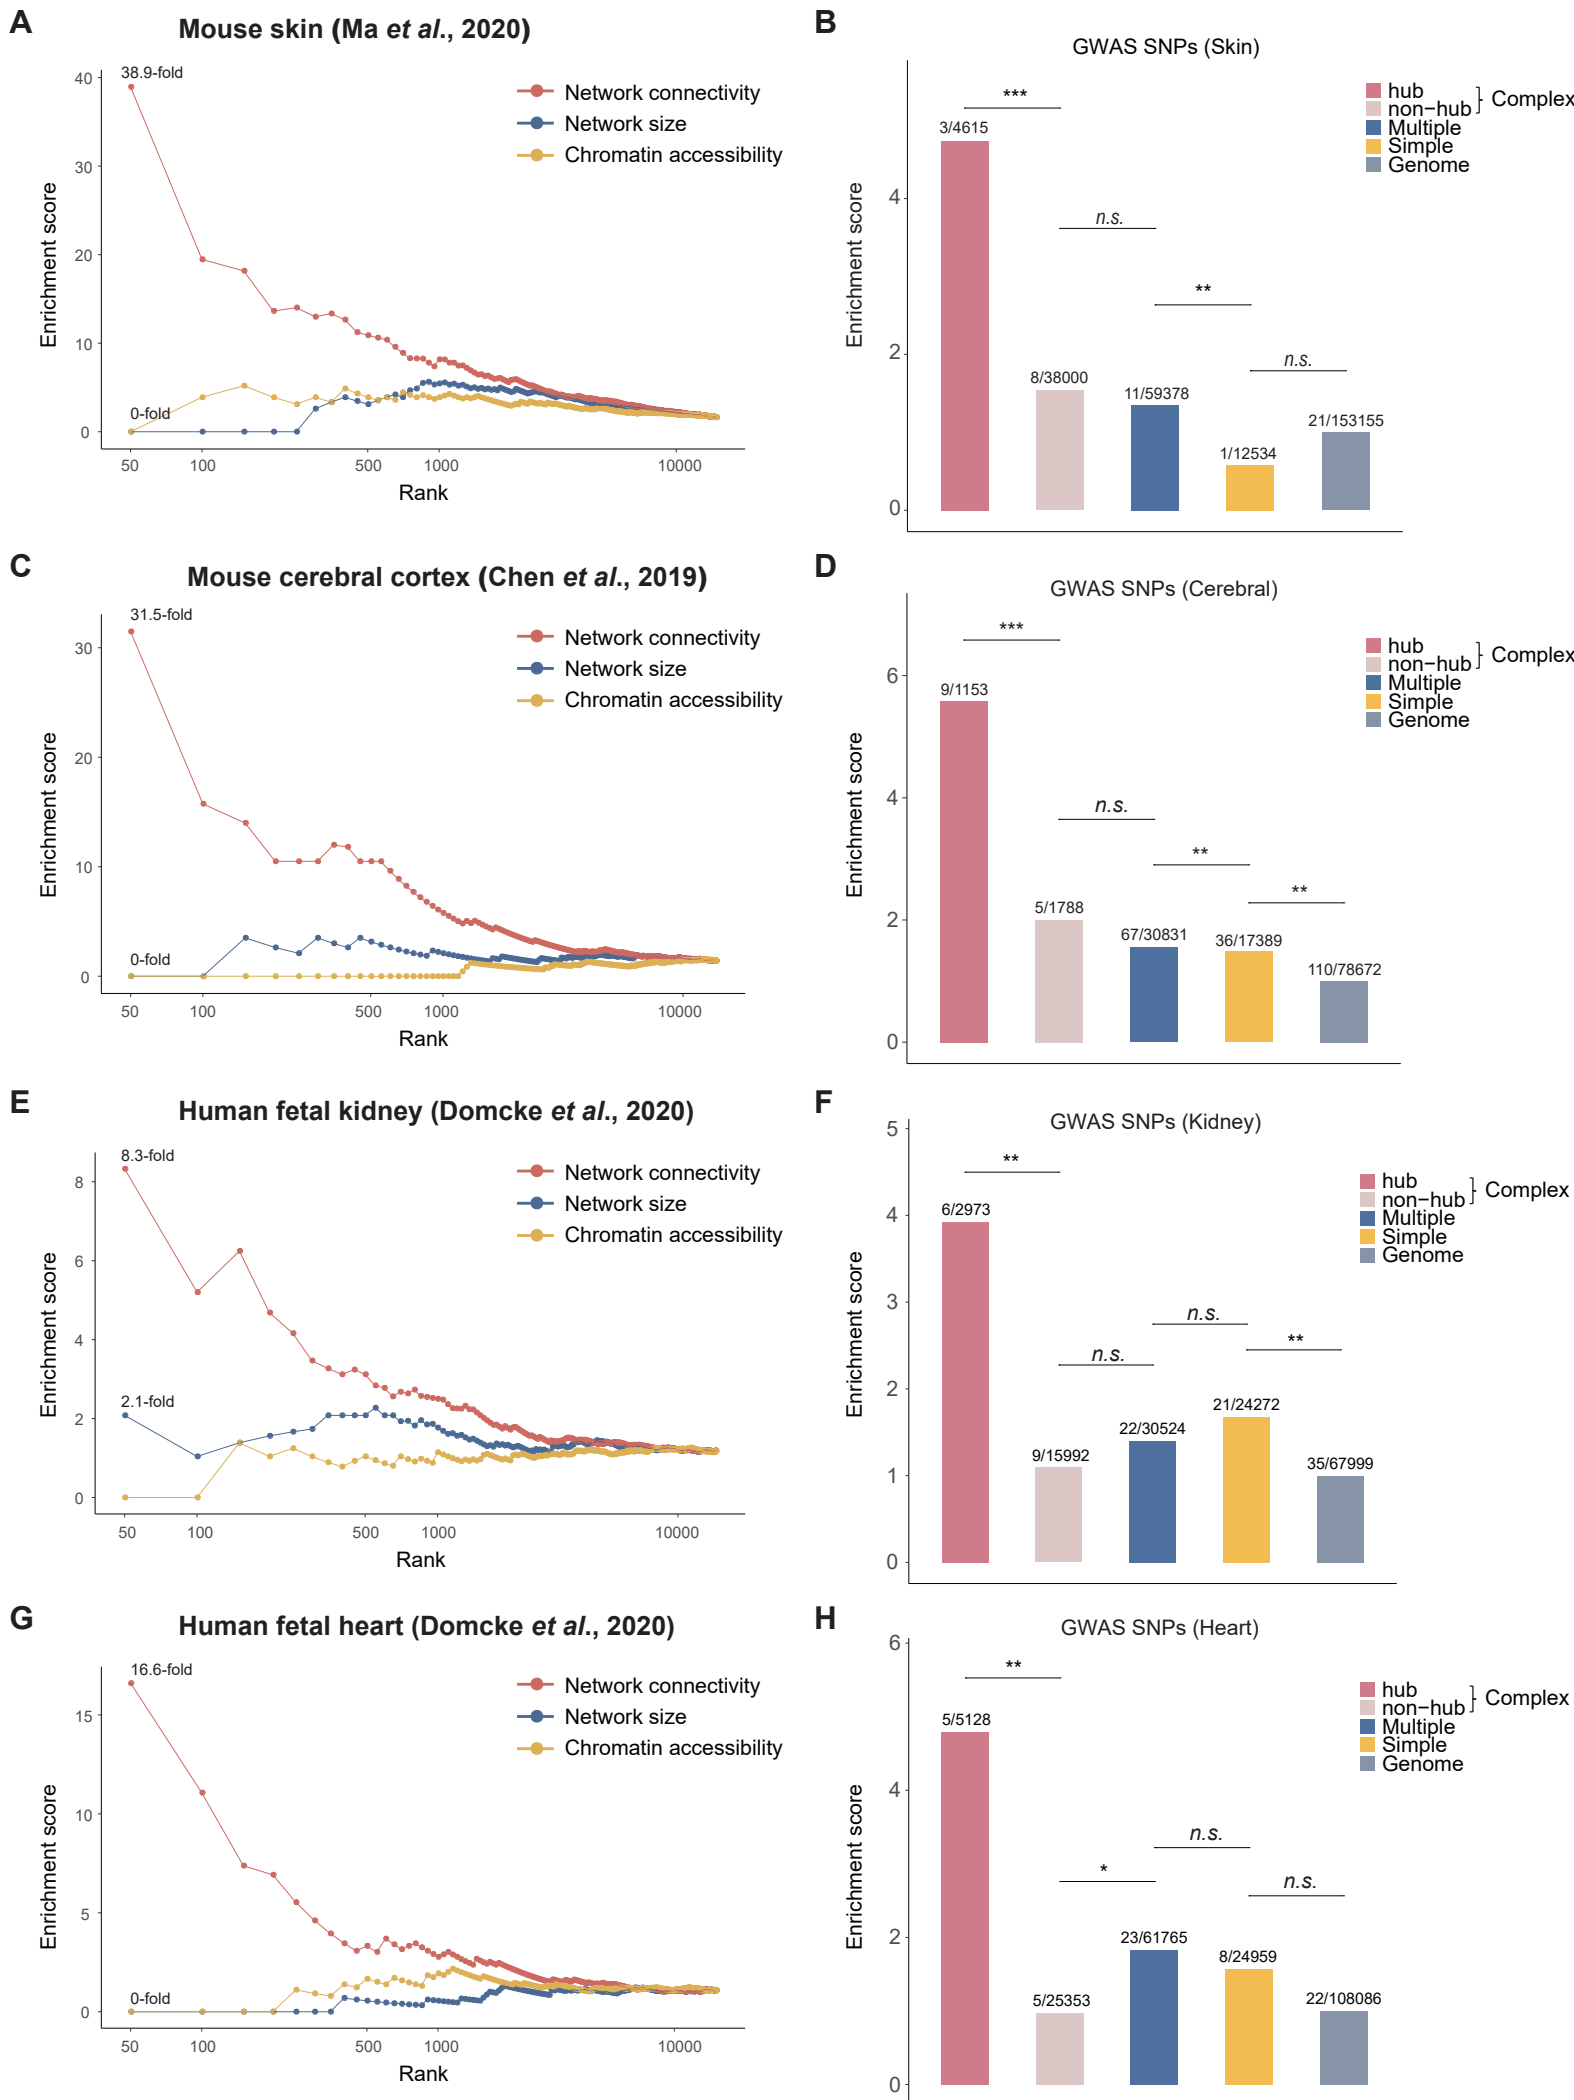



**Figure 7. Model of enhancer networks in gene regulation.**

**A**

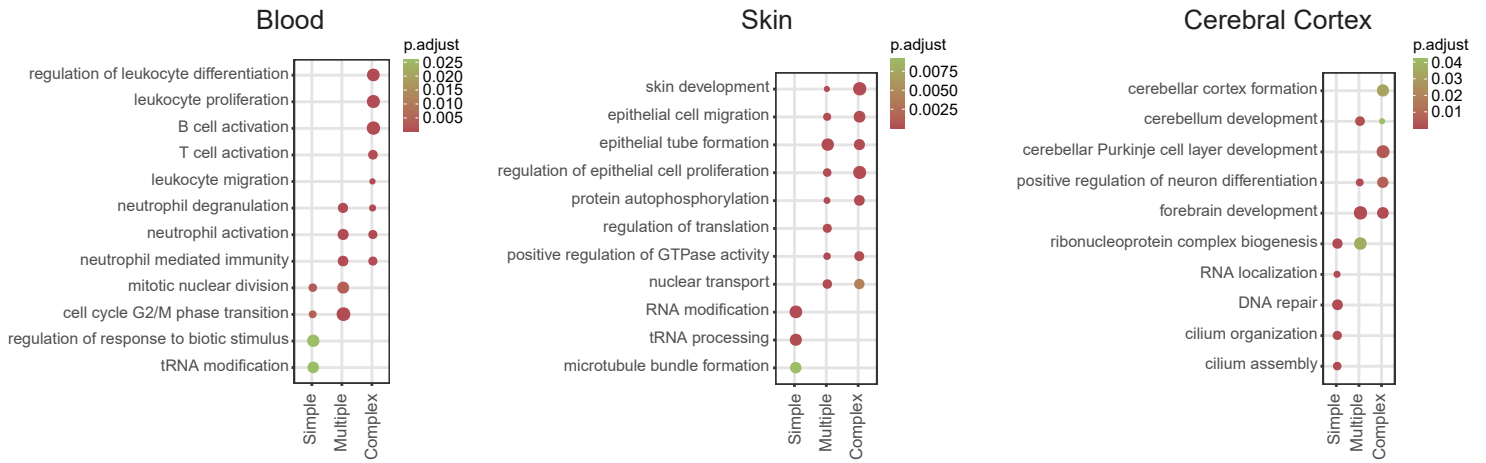

**B**

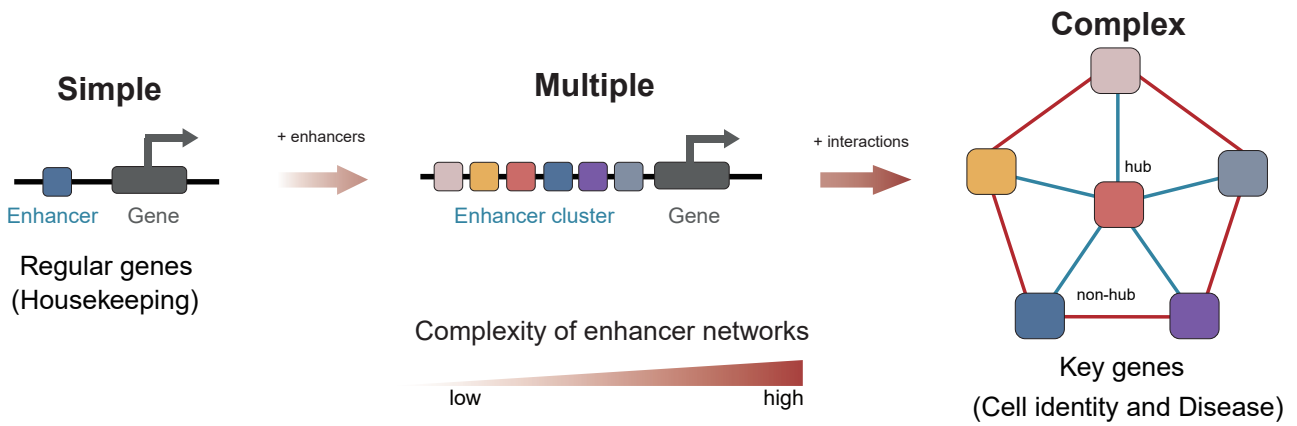

## Figure S1

**A**

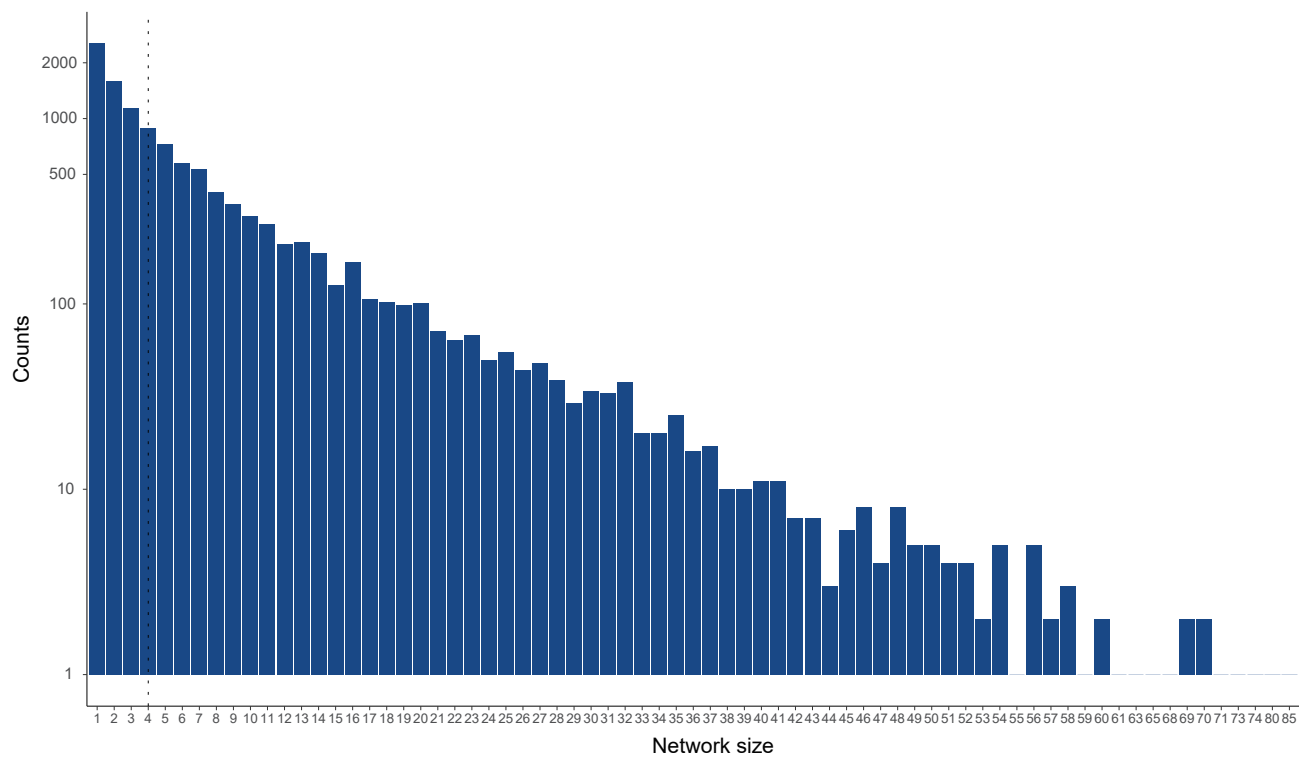

**B**

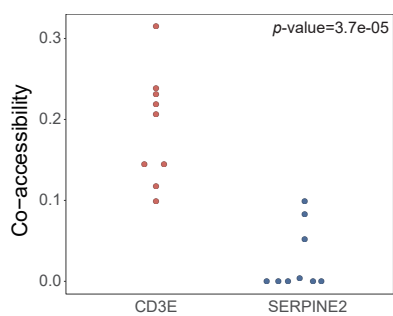

**C**

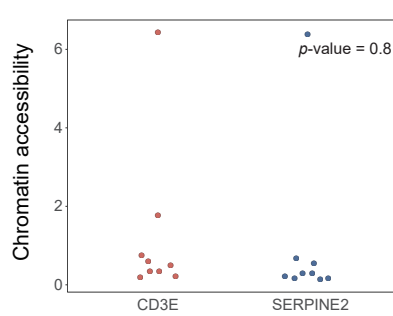

**D**

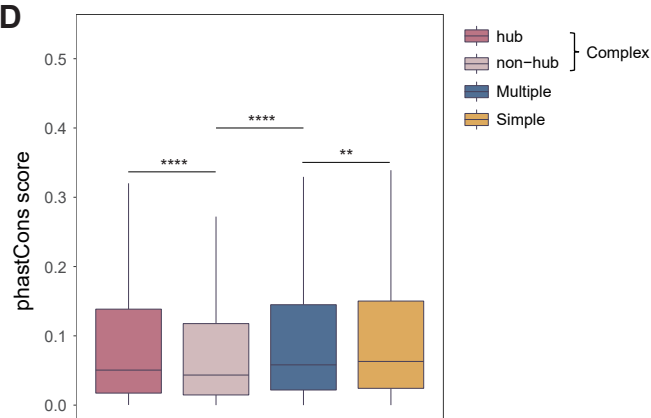

**E**

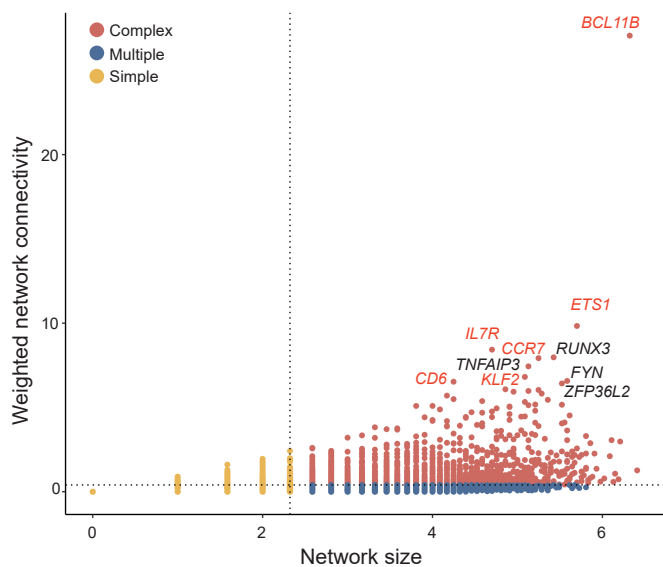

**F**

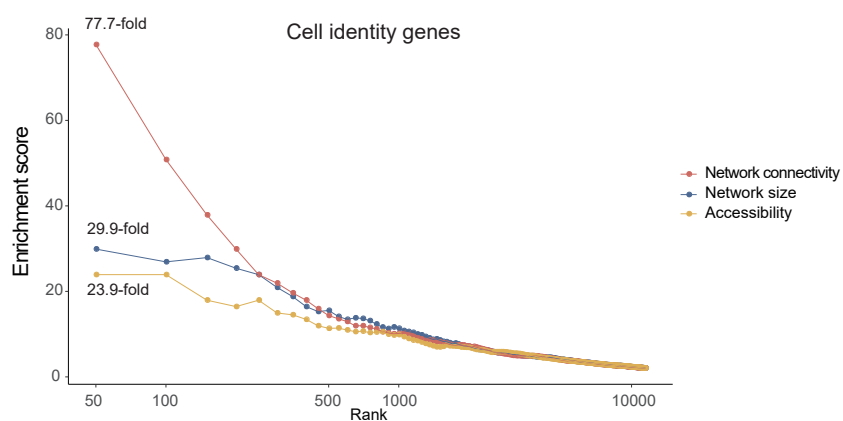

**G**

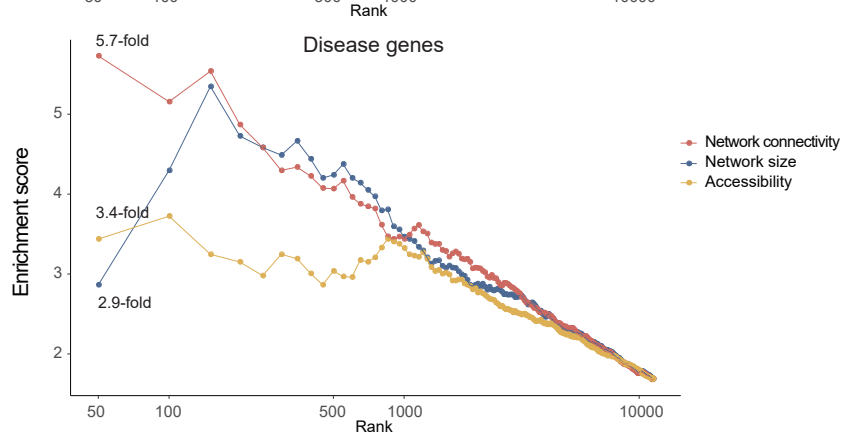



## Figure S3

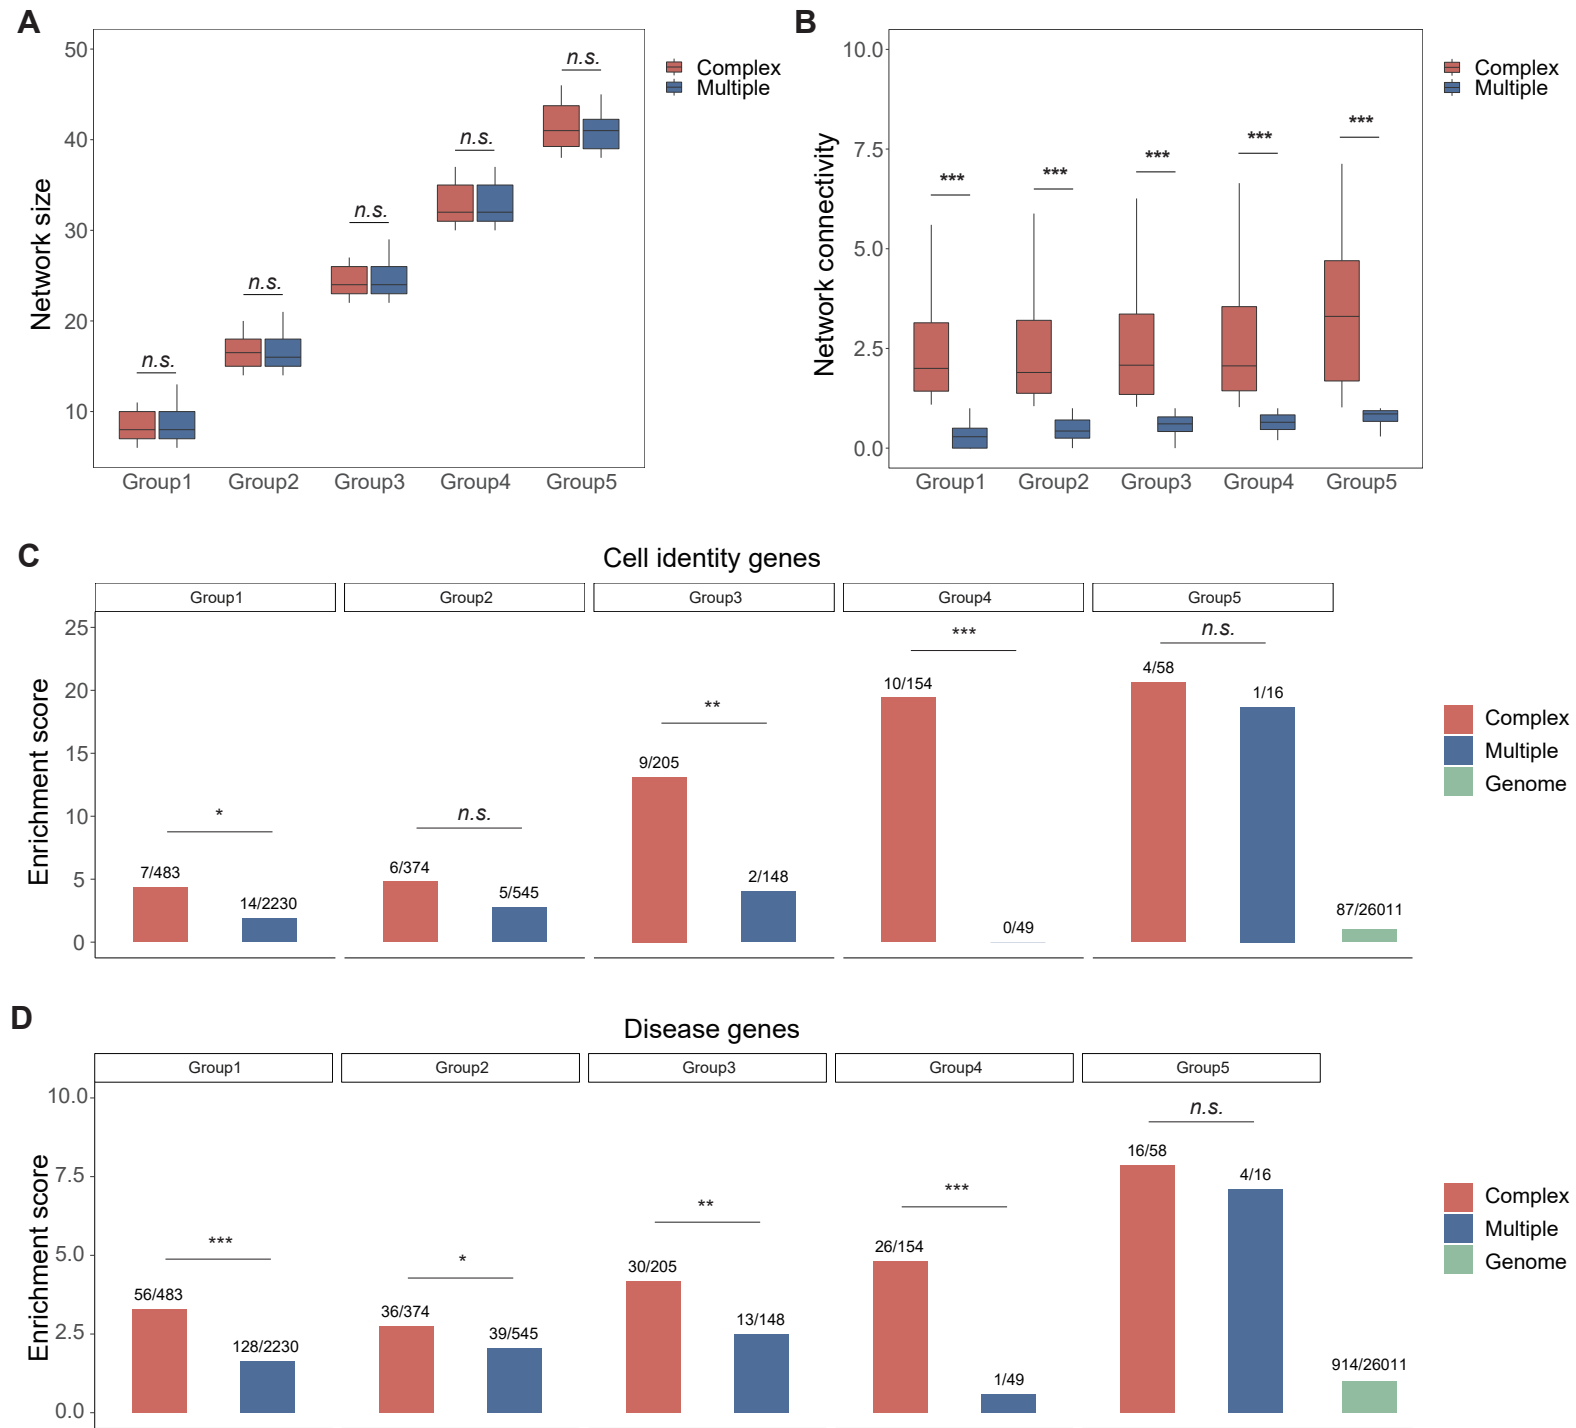

**A**

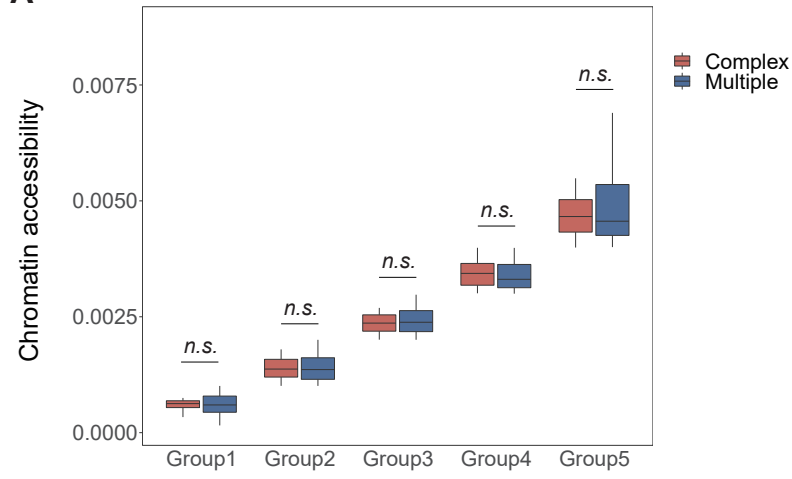

**B**

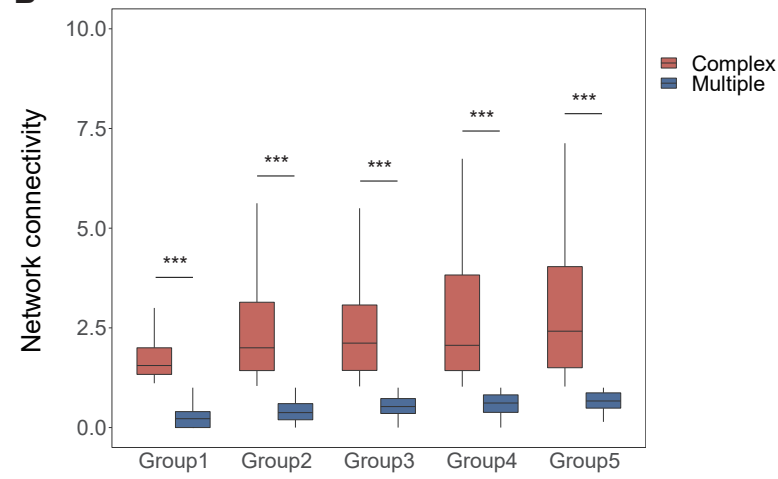

**C**

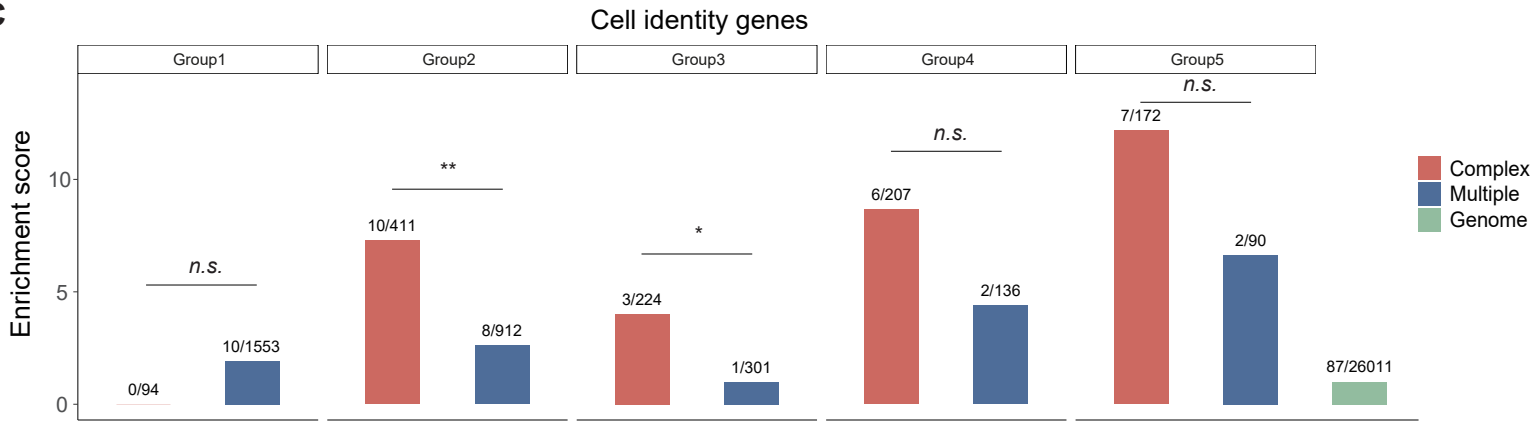

**D**

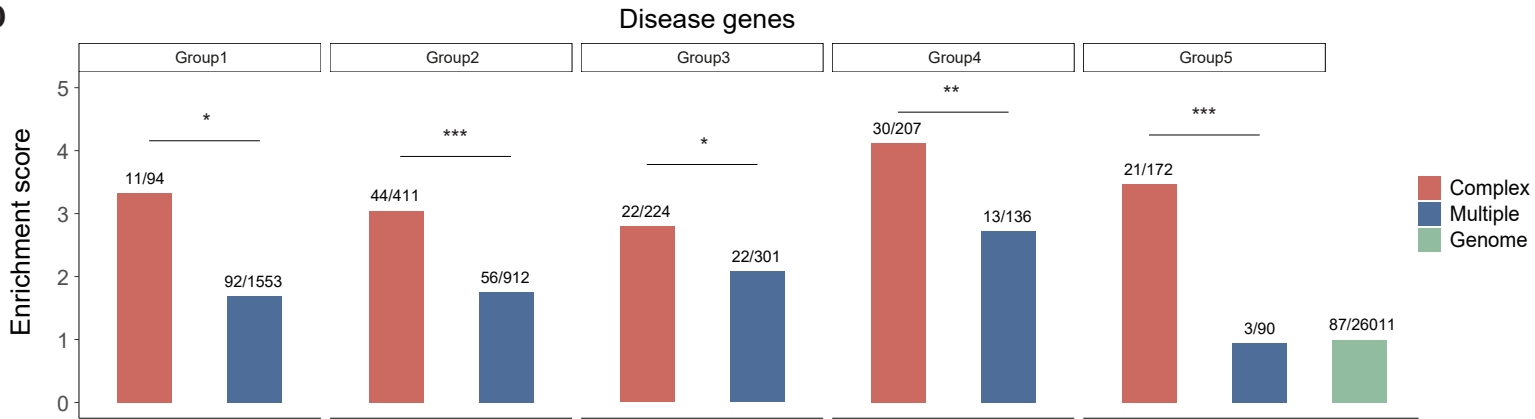

**Figure S5**

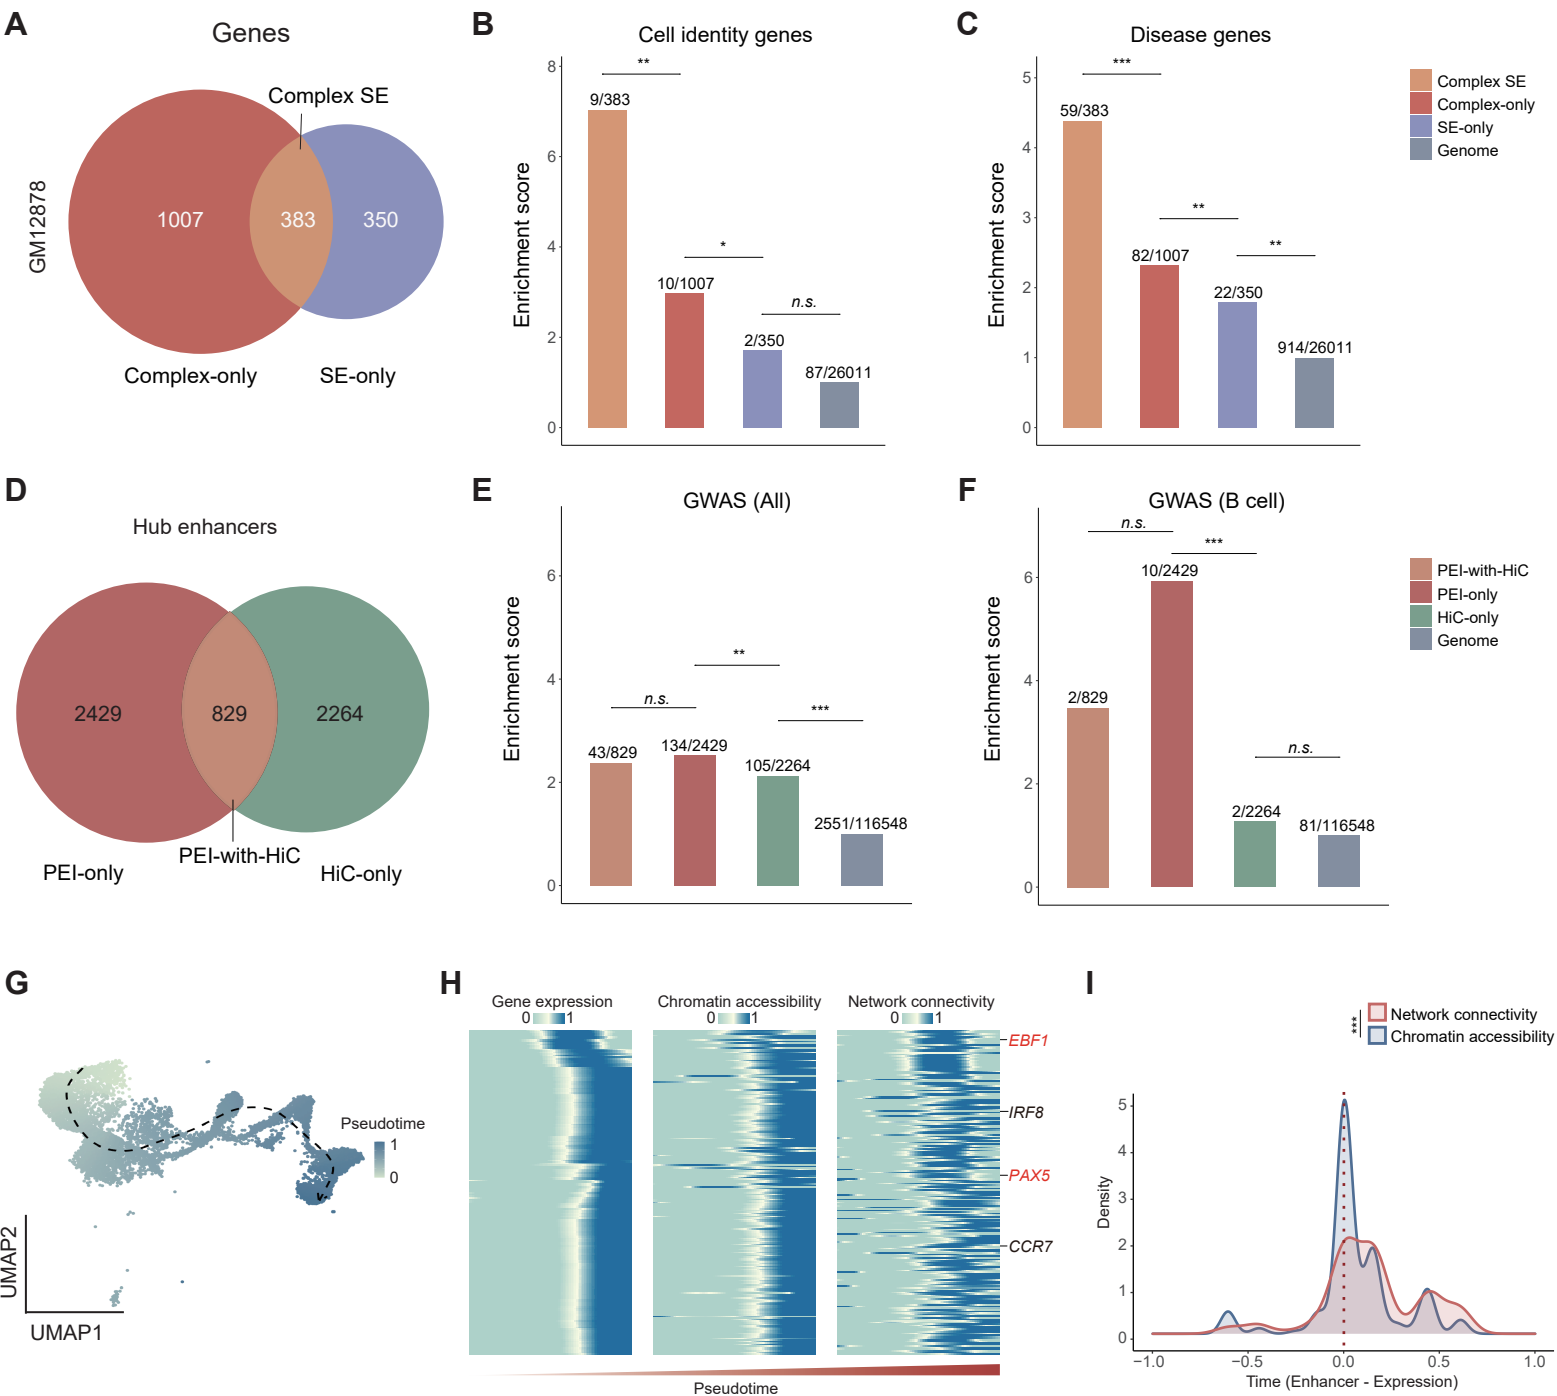

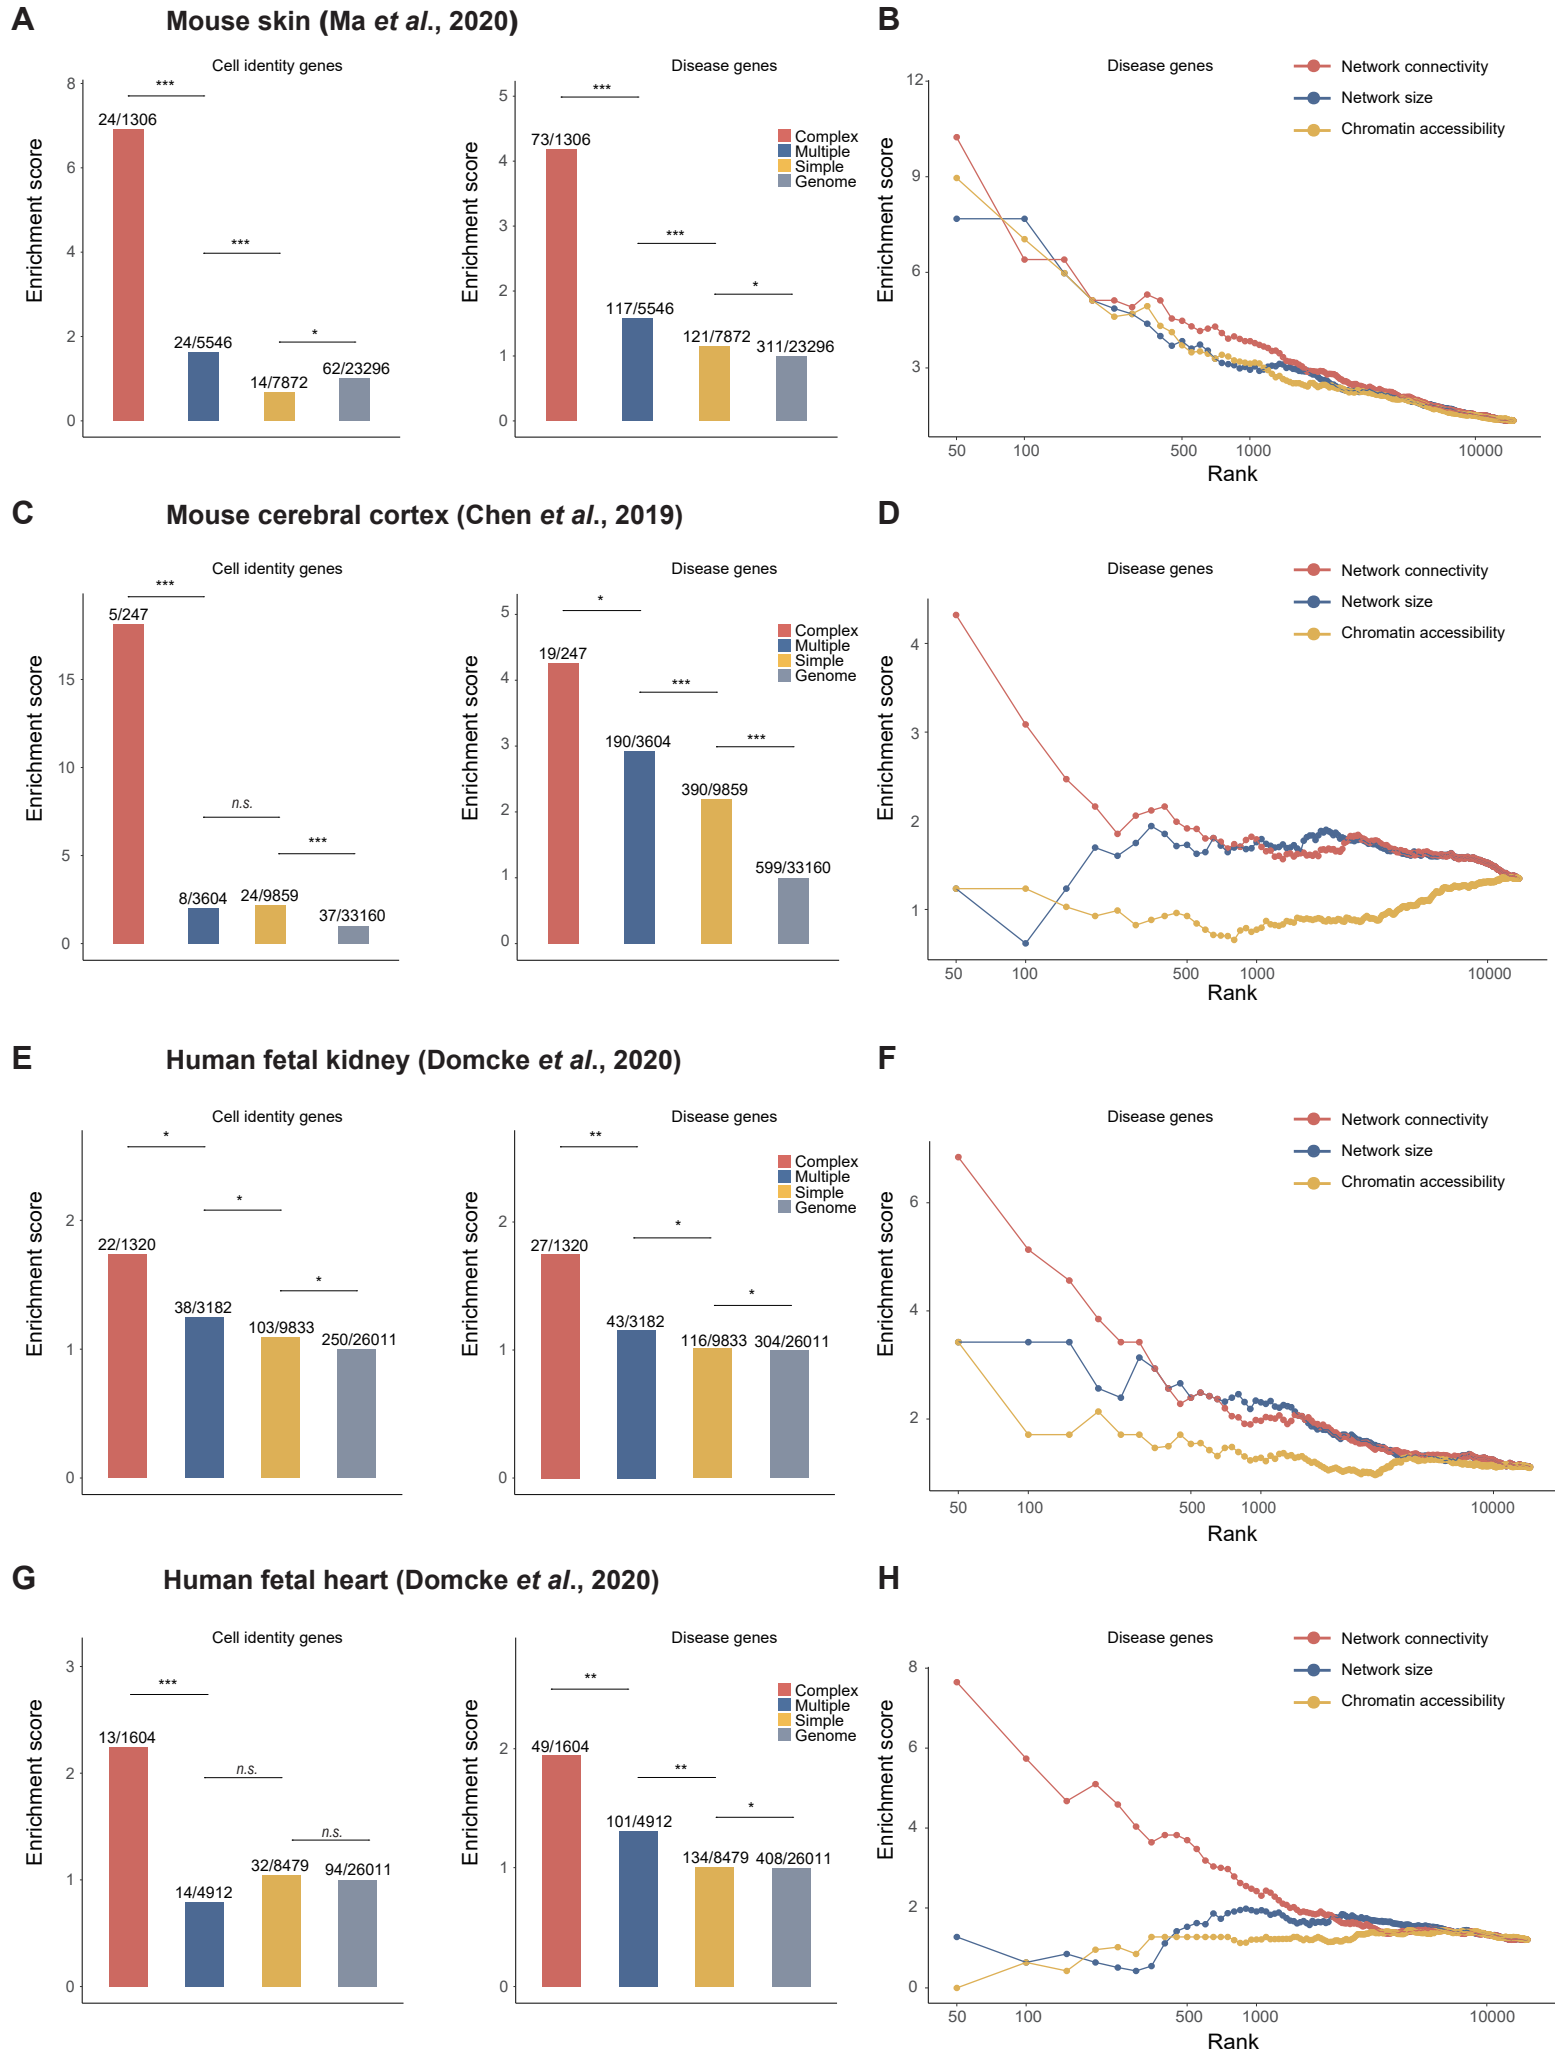

# Figure S7

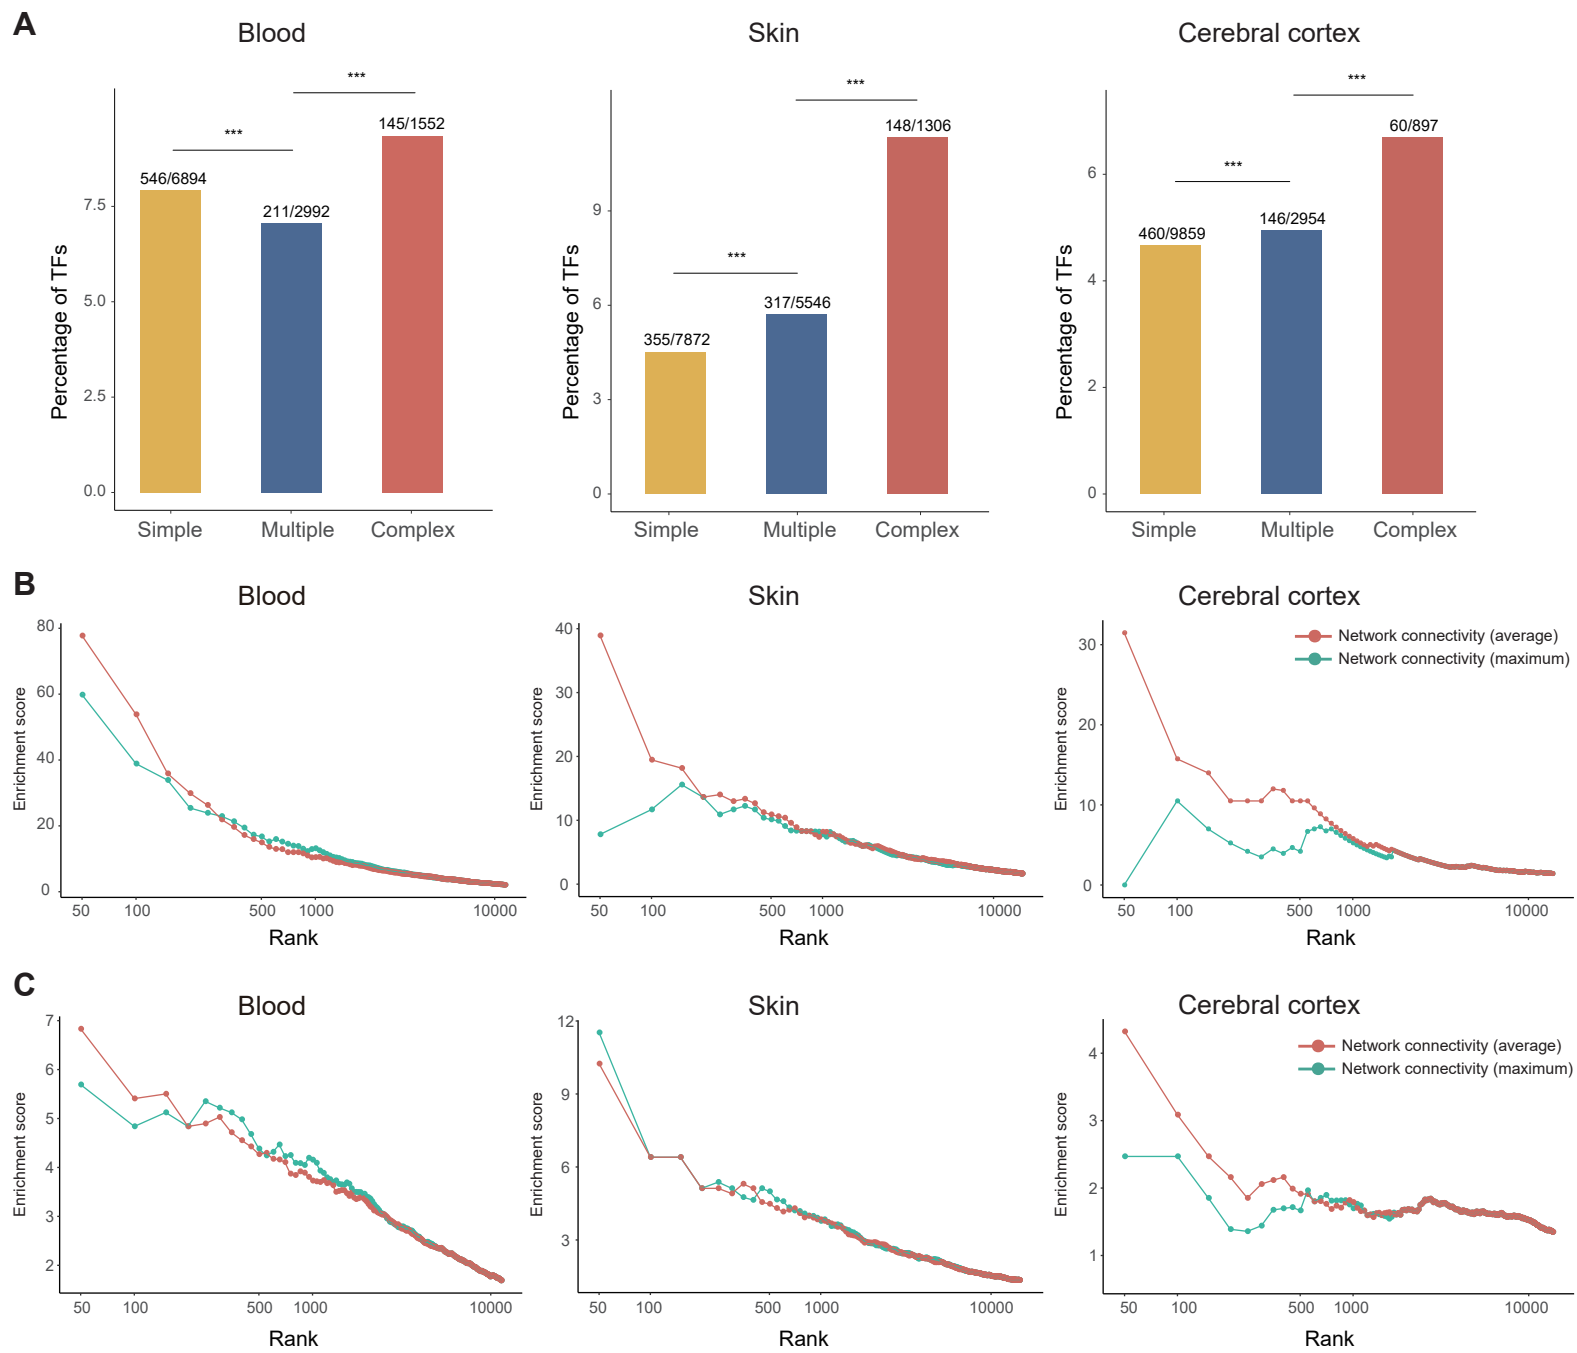

Source: http://biorxiv.org/content/10.1101/2022.05.20.492770v1.full.pdf
